# Supplementary material for: Gd-metallofullerenol nanomaterial as non-toxic breast cancer stem cell-specific inhibitor
Source: PubMed Central journal article supplement (PMC4354030; doi:10.1038/ncomms6988), 2015-01-23
Supplement: ncomms6988-s1.pdf [file ncomms6988-s1.pdf]

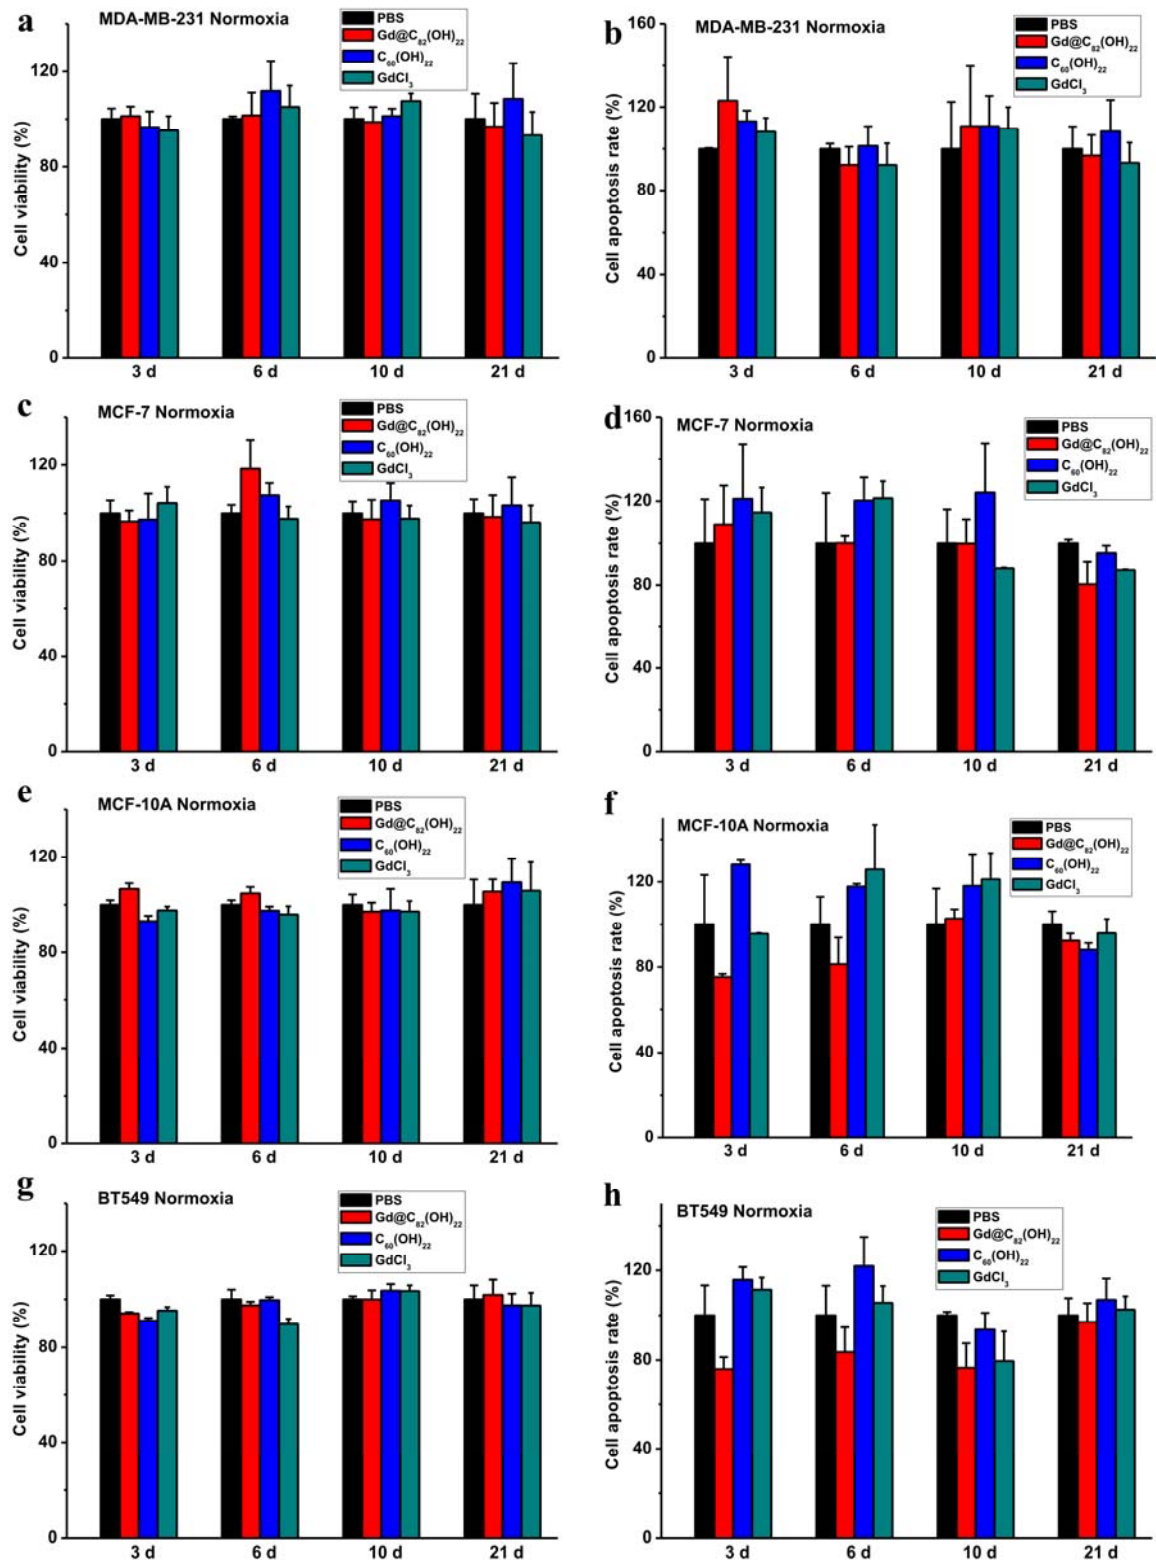

**Supplementary Figure 1. Gd@C<sub>82</sub>(OH)<sub>22</sub> nanoparticles did not affect cell viability and apoptosis.** MDA-MB-231, MCF-7, MCF-10A and BT549 cells were treated with PBS, Gd@C<sub>82</sub>(OH)<sub>22</sub>, C<sub>60</sub>(OH)<sub>22</sub> or GdCl<sub>3</sub> (all 50 μM) for 3, 6, 10 or 21 days. (a, c, e, g) Cell viability was detected using CCK-8 assay. (b, d, f, h) Cells apoptosis analysis was detected using double staining with annexin V and PI. All the data are represented as mean ± s.e.m. (n = 3 each).

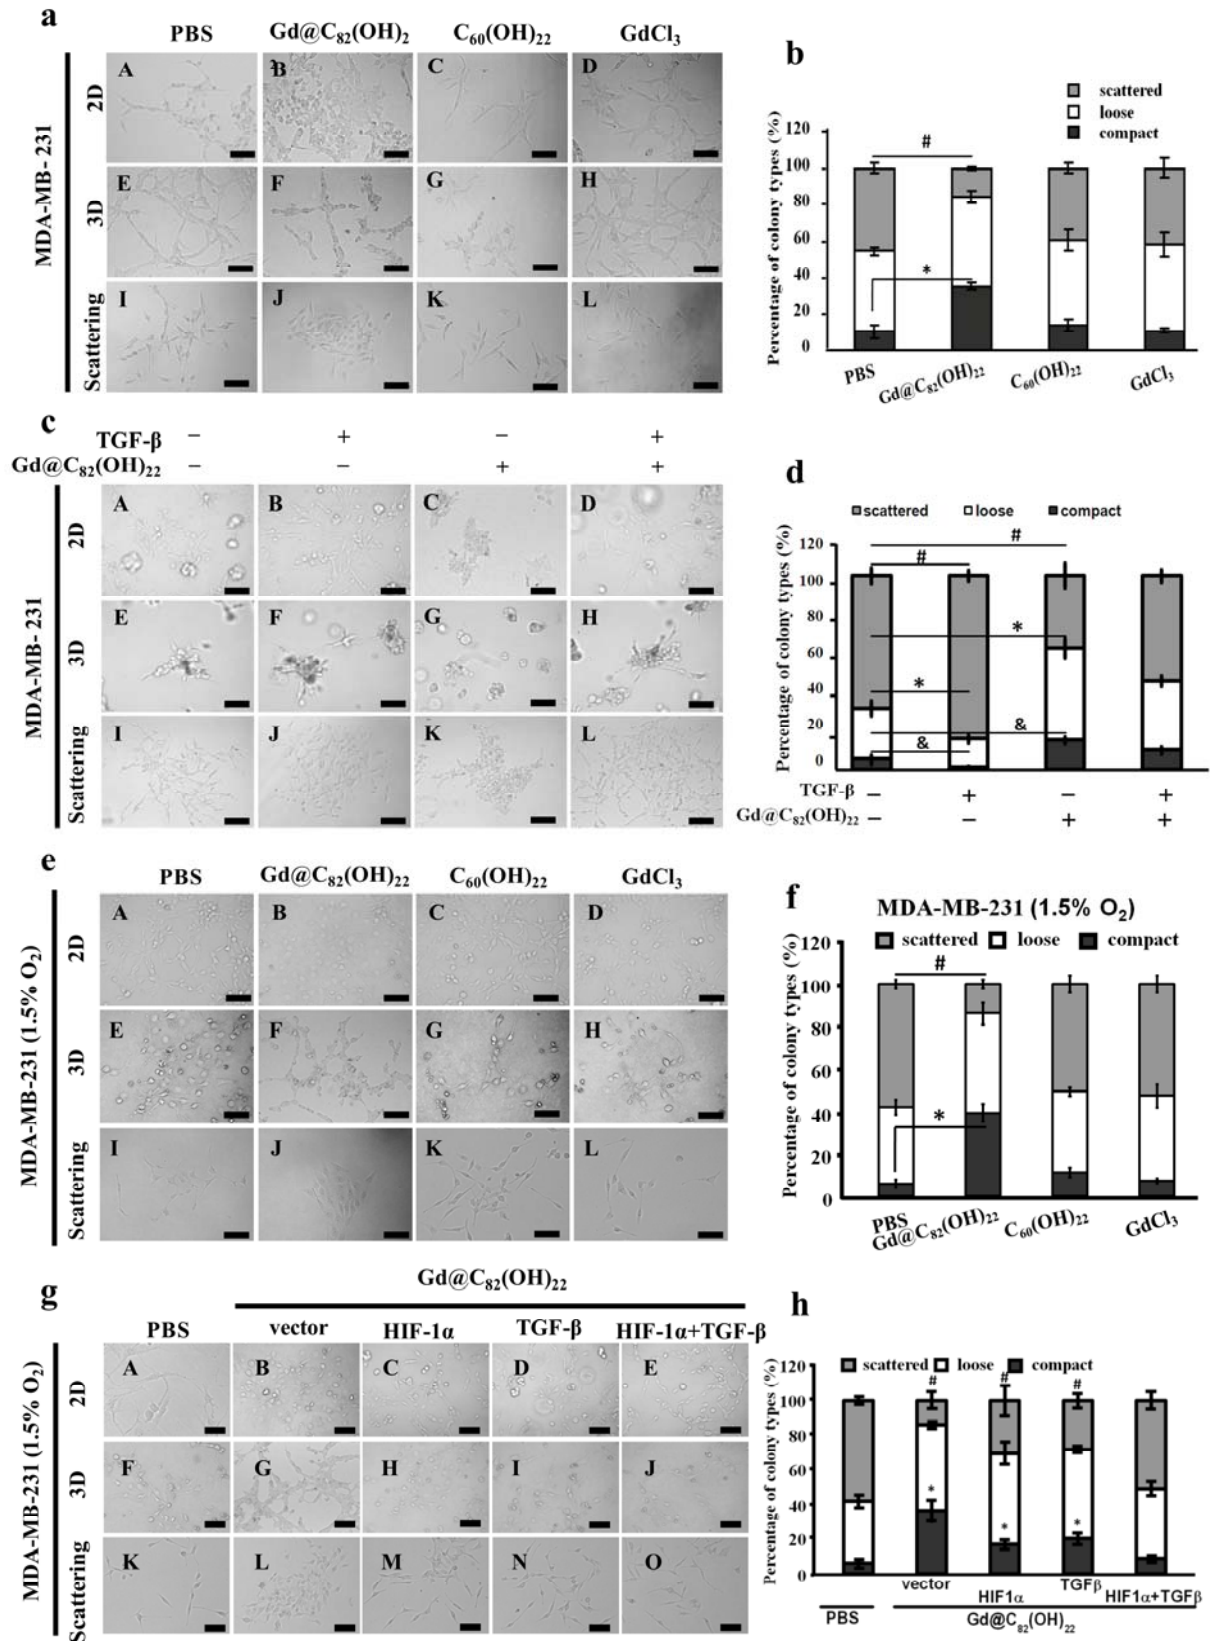

**Supplementary Figure 2.** MDA-MB-231 cells were treated with PBS (A, E, I), Gd@C<sub>82</sub>(OH)<sub>22</sub> (B, F, J), C<sub>60</sub>(OH)<sub>22</sub> (C, G, K) or GdCl<sub>3</sub> (D, H, L) (50  $\mu$ M) for 21 days. Cellular morphology of cells cultured on 2D/3D-matrigel cultures (a) and Scattering assay (b) were visualized. mean  $\pm$  s.e.m. (n = 3 each). To compact cells,

\* $p < 0.05$ ; to scattered cells, # $p < 0.05$  (one-way ANOVA, Tukey's post-hoc test). MDA-MB-231 cells were cultured with 20 ng/ml TGF- $\beta$  supplement for 24 hours after treatment with PBS or Gd@C<sub>82</sub>(OH)<sub>22</sub> for 21 days and further seeded for 2D- and 3D-matrigel cultures. Morphological changes (c) and Scattering assay (d) were observed. Scale bar = 50  $\mu$ m. mean  $\pm$  s.e.m. (n = 3 each). To loose cells, \* $p < 0.05$ ; to scattered cells, # $p < 0.05$ ; to compact cells, & $p < 0.05$  (two-way ANOVA, Bonferroni's post-hoc test). MDA-MB-231 cells were cultured in hypoxia and treated with PBS (A, E, I), 50  $\mu$ M Gd@C<sub>82</sub>(OH)<sub>22</sub> (B, F, J), C<sub>60</sub>(OH)<sub>22</sub> (C, G, K) and GdCl<sub>3</sub> (D, H, L) for 10 days. Cellular morphology of cells cultured on 2D/3D-matrigel cultures (Scale bar = 50  $\mu$ m) (e) and Scattering assay (f) were visualization. mean  $\pm$  s.e.m. (n = 3 each). To compact cells, \* $p < 0.05$ ; to scattered cells, # $p < 0.05$  (one-way ANOVA, Tukey's post-hoc test). MDA-MB-231 cells were transfected with HIF-1 $\alpha$  expressing plasmid and/or treated with 20 ng/ml TGF- $\beta$  with further culture in presence of Gd@C<sub>82</sub>(OH)<sub>22</sub> or PBS under hypoxia for 10 days. Cellular morphology of cells cultured on 2D/3D-matrigel cultures (Scale bar = 50  $\mu$ m) (g) and Scattering assay (h) were visualized. mean  $\pm$  s.e.m. (n = 3 each). To compact cells, \* $p < 0.05$ ; to scattered cells, # $p < 0.05$  (two-way ANOVA, Bonferroni's post-hoc test).

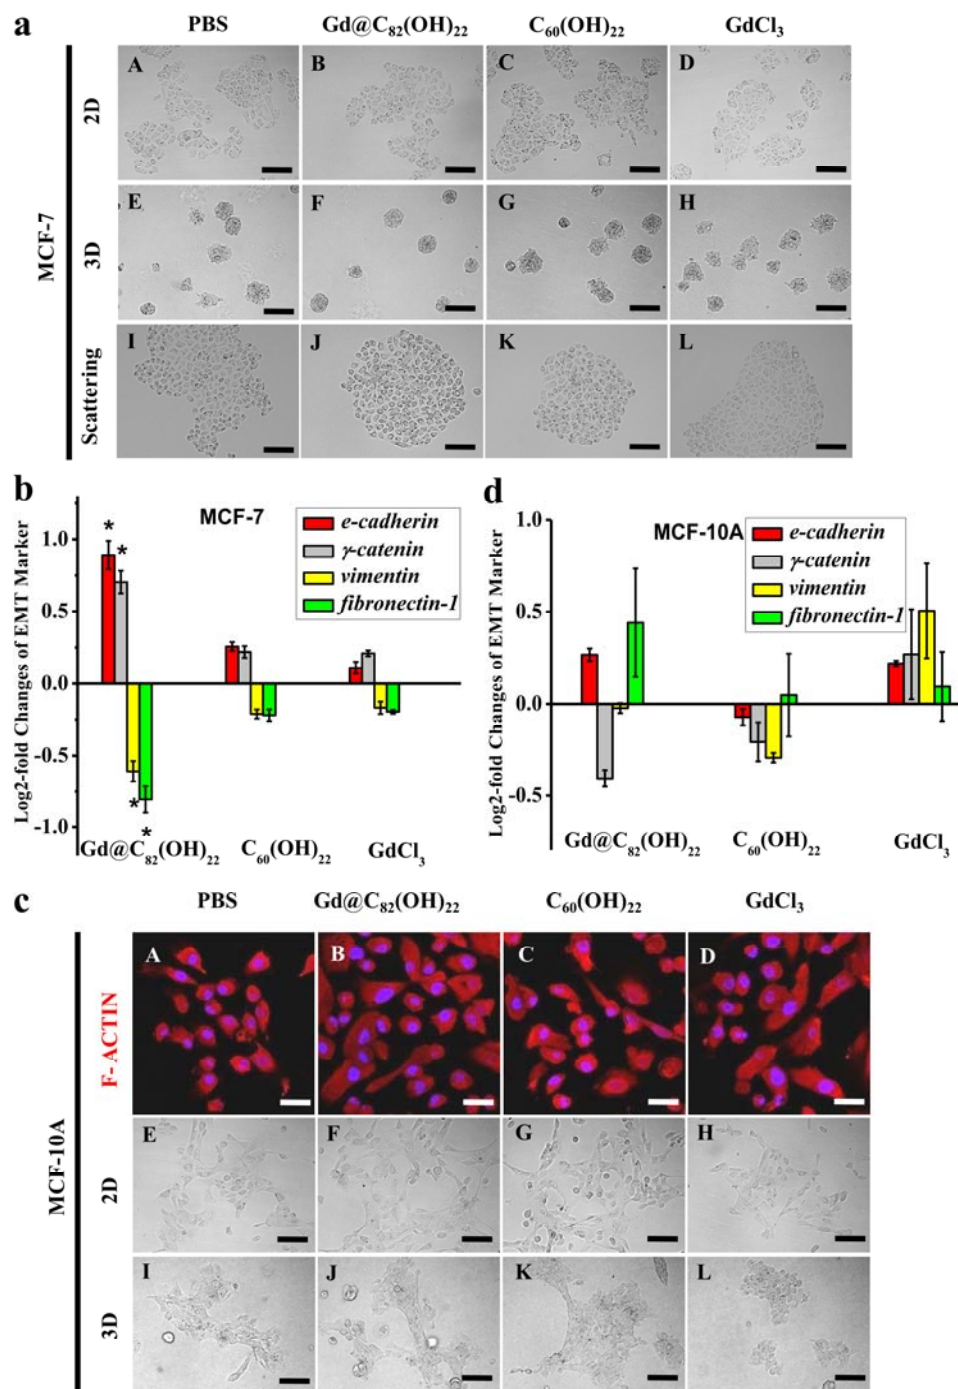

**Supplementary Figure 3.** MCF-7 and MCF-10A cells were treated with PBS, Gd@C<sub>82</sub>(OH)<sub>22</sub>, C<sub>60</sub>(OH)<sub>22</sub> and GdCl<sub>3</sub> (all 50  $\mu$ M) for 21 days. (a) Cellular morphology of MCF-7 cells was observed on 2D- and 3D-matrigel culture or monolayer adherent culture. Scale bar = 50  $\mu$ m. (c) Cellular morphology of MCF-10A cells on 2D- and 3D-matrigel cultures. Scale bar = 50  $\mu$ m. Actin cytoskeleton (red) was observed. (Scale bar = 12.5  $\mu$ m). (b, d) mRNA levels of EMT markers (*e-cadherin*,  $\gamma$ -catenin, vimentin and fibronectin-1) were analyzed by real-time PCR (mean  $\pm$  s.e.m., n = 3 each). \**p* < 0.05 (one-way ANOVA, Tukey's post-hoc test).

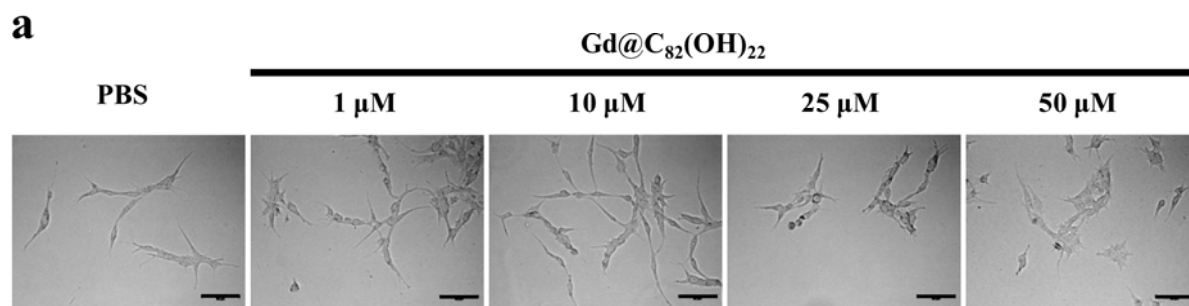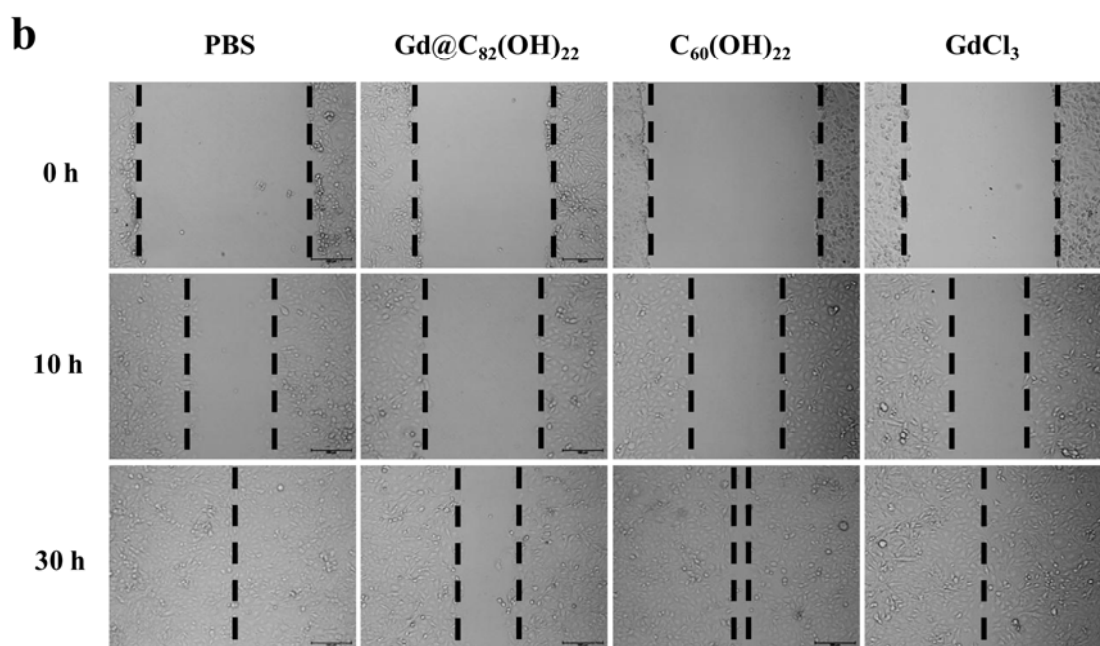

**Supplementary Figure 4.** (a) MDA-MB-231 cells were cultured and treated for 21 days with PBS and  $\text{Gd@C}_{82}(\text{OH})_{22}$  (0.1, 1, 10 and 50  $\mu\text{M}$ ). Representative images are shown. (b) Cell motility was evaluated by wound healing assay.

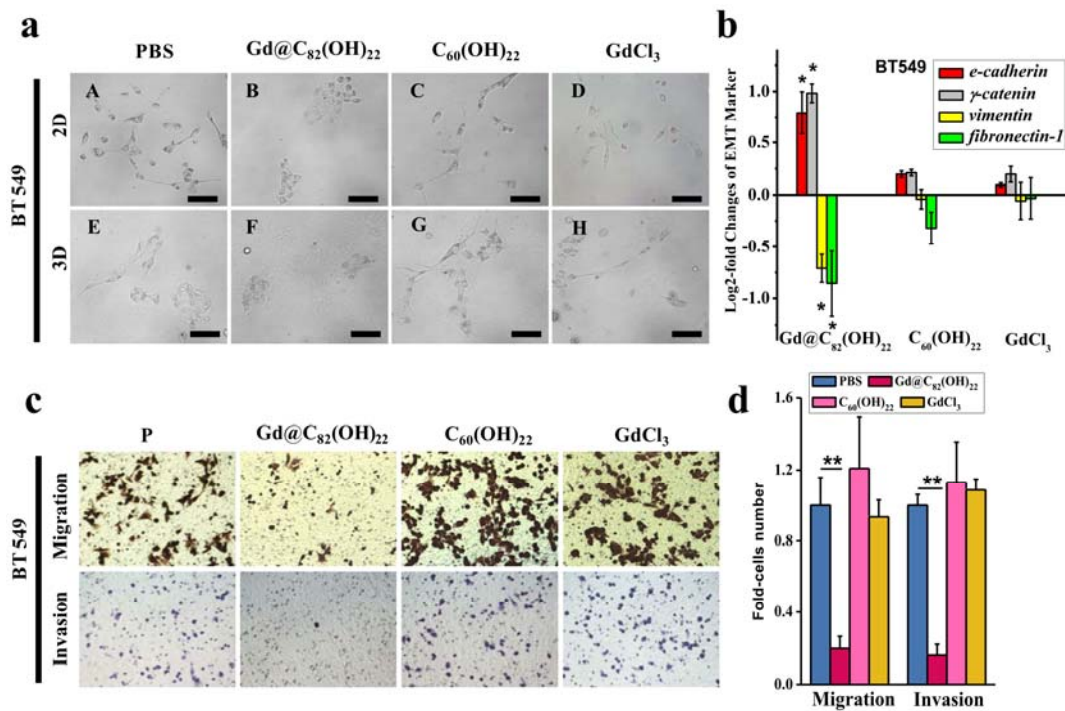

**Supplementary Figure 5.** BT549 cells were treated with PBS, Gd@C<sub>82</sub>(OH)<sub>22</sub>, C<sub>60</sub>(OH)<sub>22</sub> or GdCl<sub>3</sub> (50  $\mu$ M) for 21 days. (a) Cellular morphology was observed in 2D- and 3D-matrigel cultures. Scale bar = 50  $\mu$ m. (b) mRNA levels of EMT markers (*e-cadherin*,  $\gamma$ -catenin, vimentin and *fibronectin-1*) were analyzed by real-time PCR (mean  $\pm$  s.e.m., n = 3 each). \* $p$  < 0.05 (one-way ANOVA, Tukey's post-hoc test). (c, d) Cell migration and invasion were examined using trans-well cell culture chambers and Matrigel-coated ones (mean  $\pm$  s.e.m., n = 6 each). \* $p$  < 0.05 and \*\* $p$  < 0.01 (one-way ANOVA, Tukey's post-hoc test).



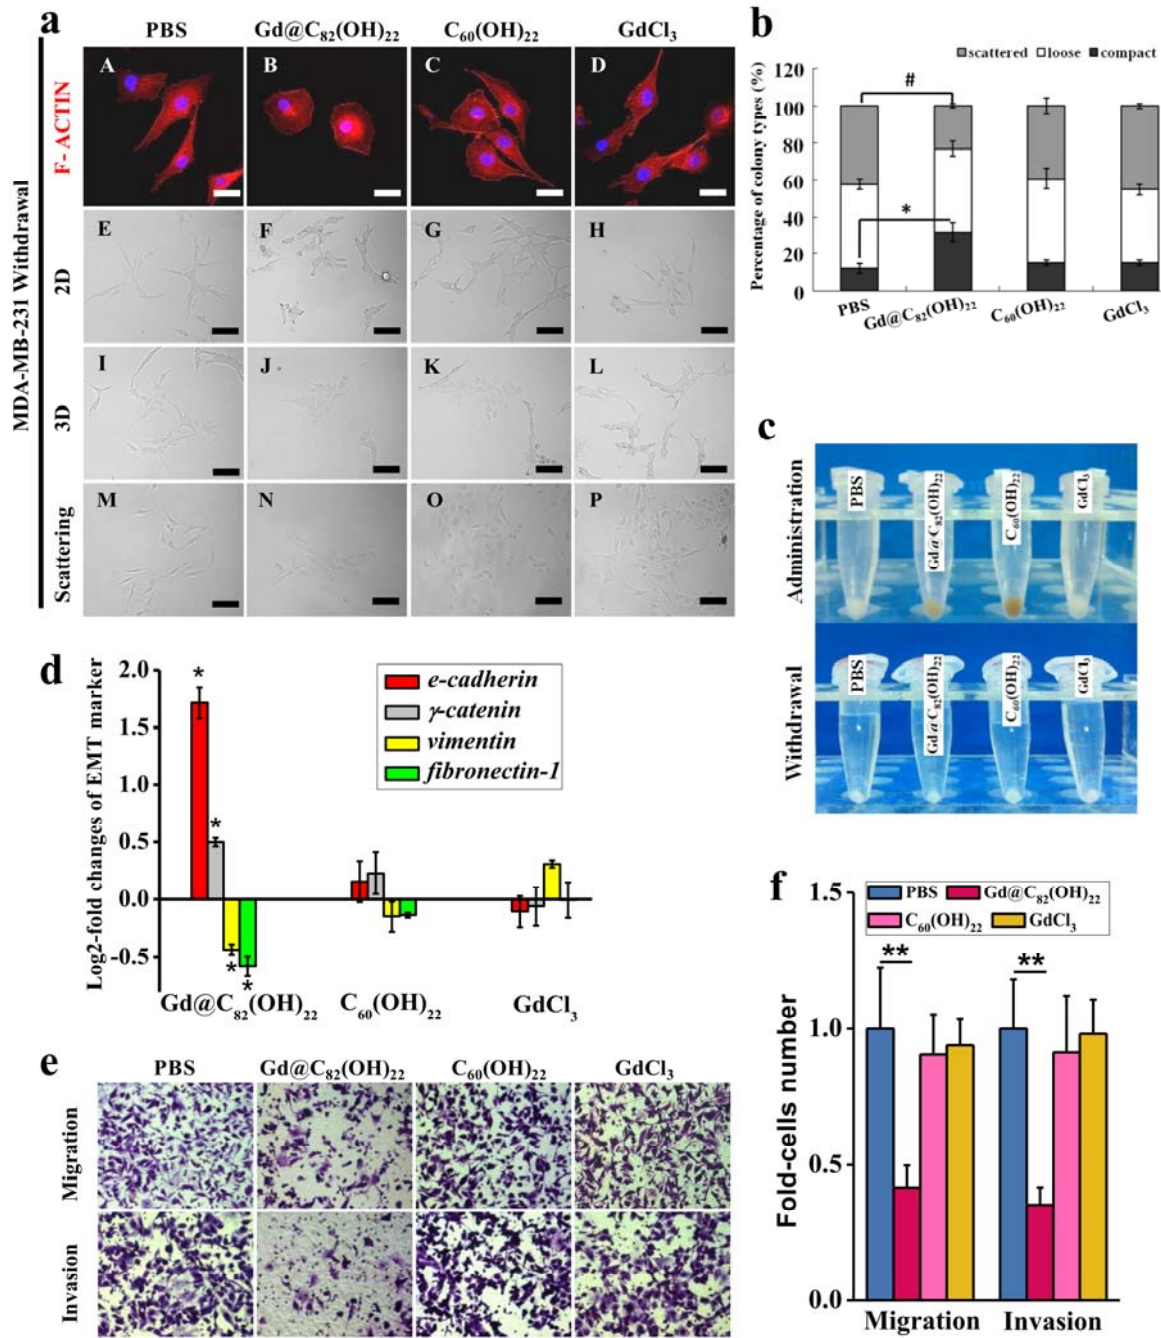

**Supplementary Figure 6.** MDA-MB-231 cells were treated with PBS, Gd@C<sub>82</sub>(OH)<sub>22</sub>, C<sub>60</sub>(OH)<sub>22</sub> or GdCl<sub>3</sub> for 21 days and then subjected to agent withdrawal of for 14-day. (a) Cellular morphology. Scale bar = 50  $\mu$ m. Actin cytoskeleton (red) was observed. (Scale bar = 12.5  $\mu$ m). (b) Cell scattering assay. (mean  $\pm$  s.e.m., n = 3 each). To compact cells, \**p* < 0.05; to scattered cells, #*p* < 0.05 (one-way ANOVA, Tukey's post-hoc test). (c) The changes of color of cell mass prepared by centrifugation before and after withdrawal. (d) The mRNA level of EMT markers (*e-cadherin*,  $\gamma$ -catenin, vimentin and fibronectin-1) were analyzed by real-time PCR (mean  $\pm$  s.e.m., n = 3 each). \**p* < 0.05 (one-way ANOVA, Tukey's post-hoc test). (e, f) Cell migration and invasion were examined using trans-well cell culture chambers and Matrigel-coated ones (mean  $\pm$  s.e.m., n = 6 each). \*\**p* < 0.01 (one-way ANOVA, Tukey's post-hoc test).

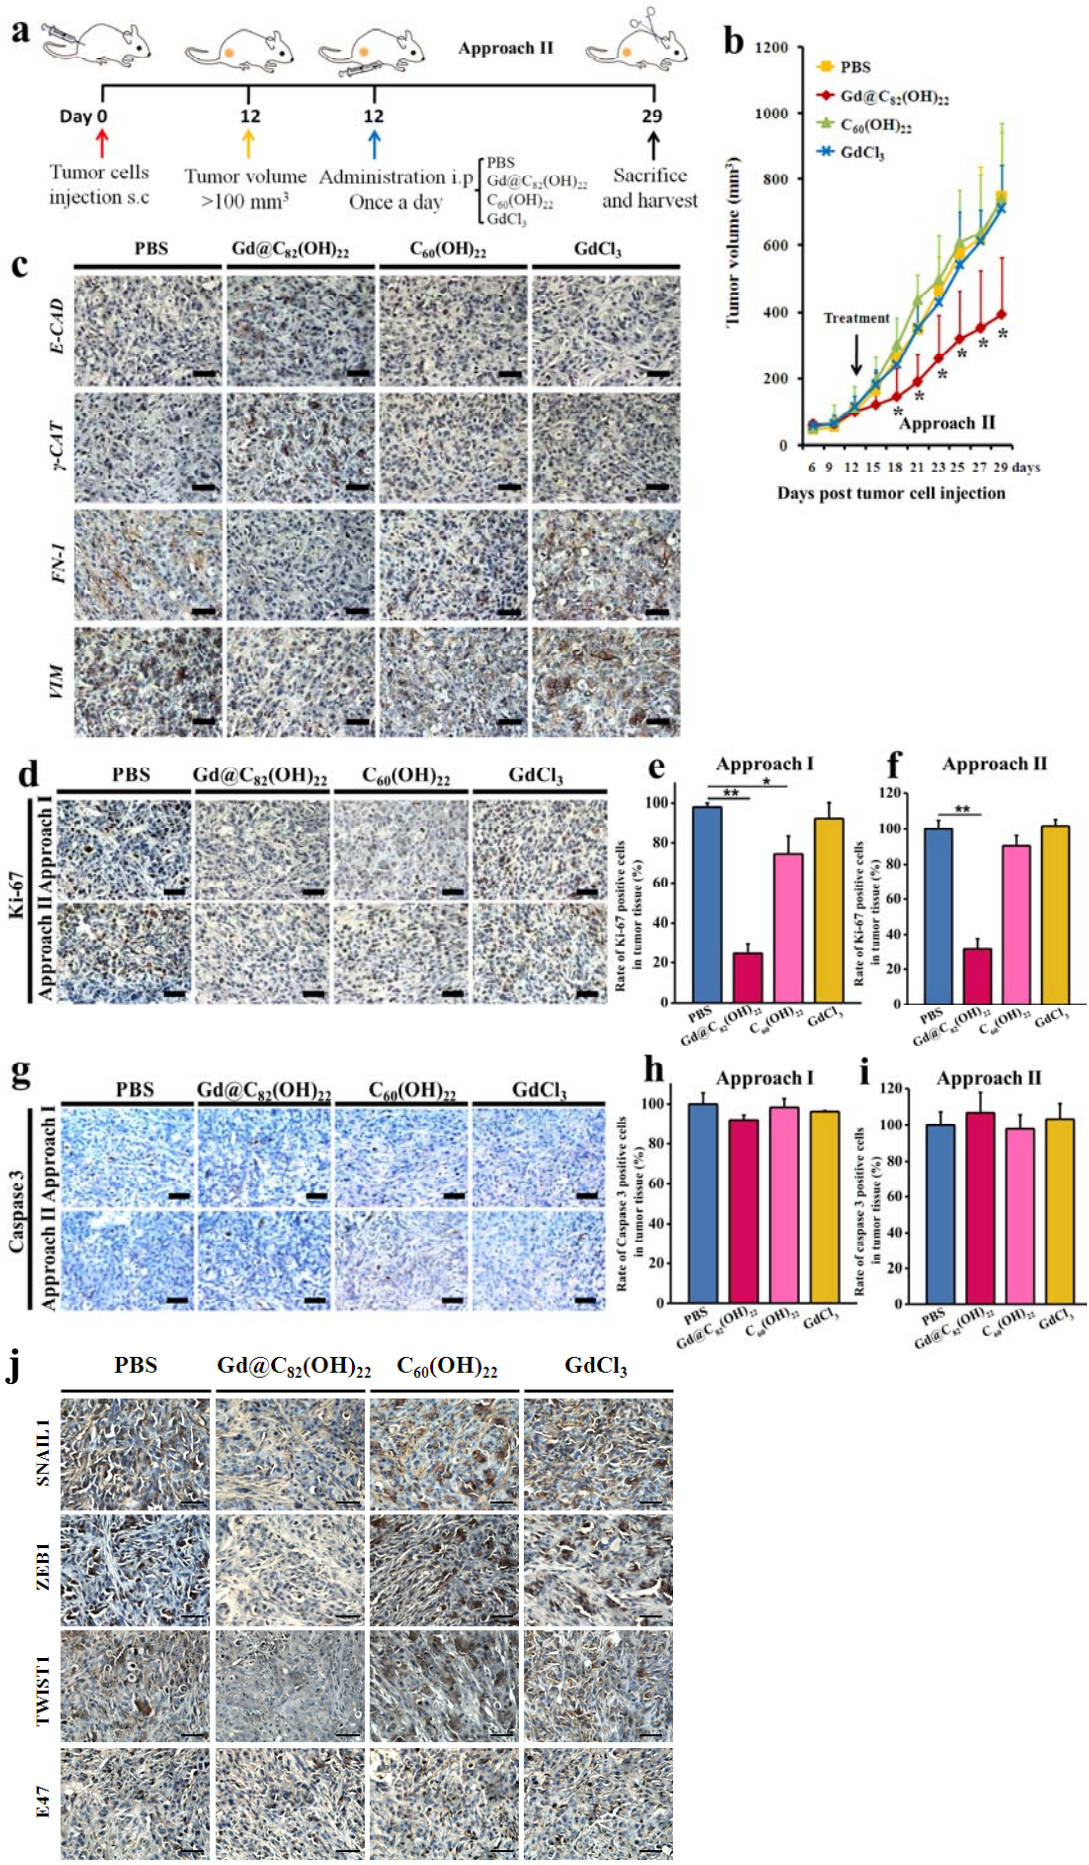



**Supplementary Figure 7. Inhibition of tumor growth by Gd@C<sub>82</sub>(OH)<sub>22</sub> in a mouse xenograft model.** (a) Experimental design of approach II (terminal treatment) mice model. Tumor growth curves in approach II (b) mice were plotted. (mean ± s.e.m., n = 5 each). \**p* < 0.05 (two-way ANOVA, Bonferroni's post-hoc test). (c) Expressions of EMT markers in tumors (approach I) sections were detected using immuno-histochemical method (Scale bars represent 25 μm). Expression of Ki-67 (d) and active-caspase-3 (g) in tumor tissues of the approach I or II mice (Scale bars represent 25 μm). Ki-67 (e, f) and active-caspase-3 (h, i) positive cells were quantified (mean ± s.e.m., n = 3 each). \**p* < 0.05 and \*\**p* < 0.01 (one-way ANOVA, Tukey's post-hoc test). (j) Expression of SNAIL, ZEB1, TWIST1 and E47 in tumors were detected using immuno-histochemical method.

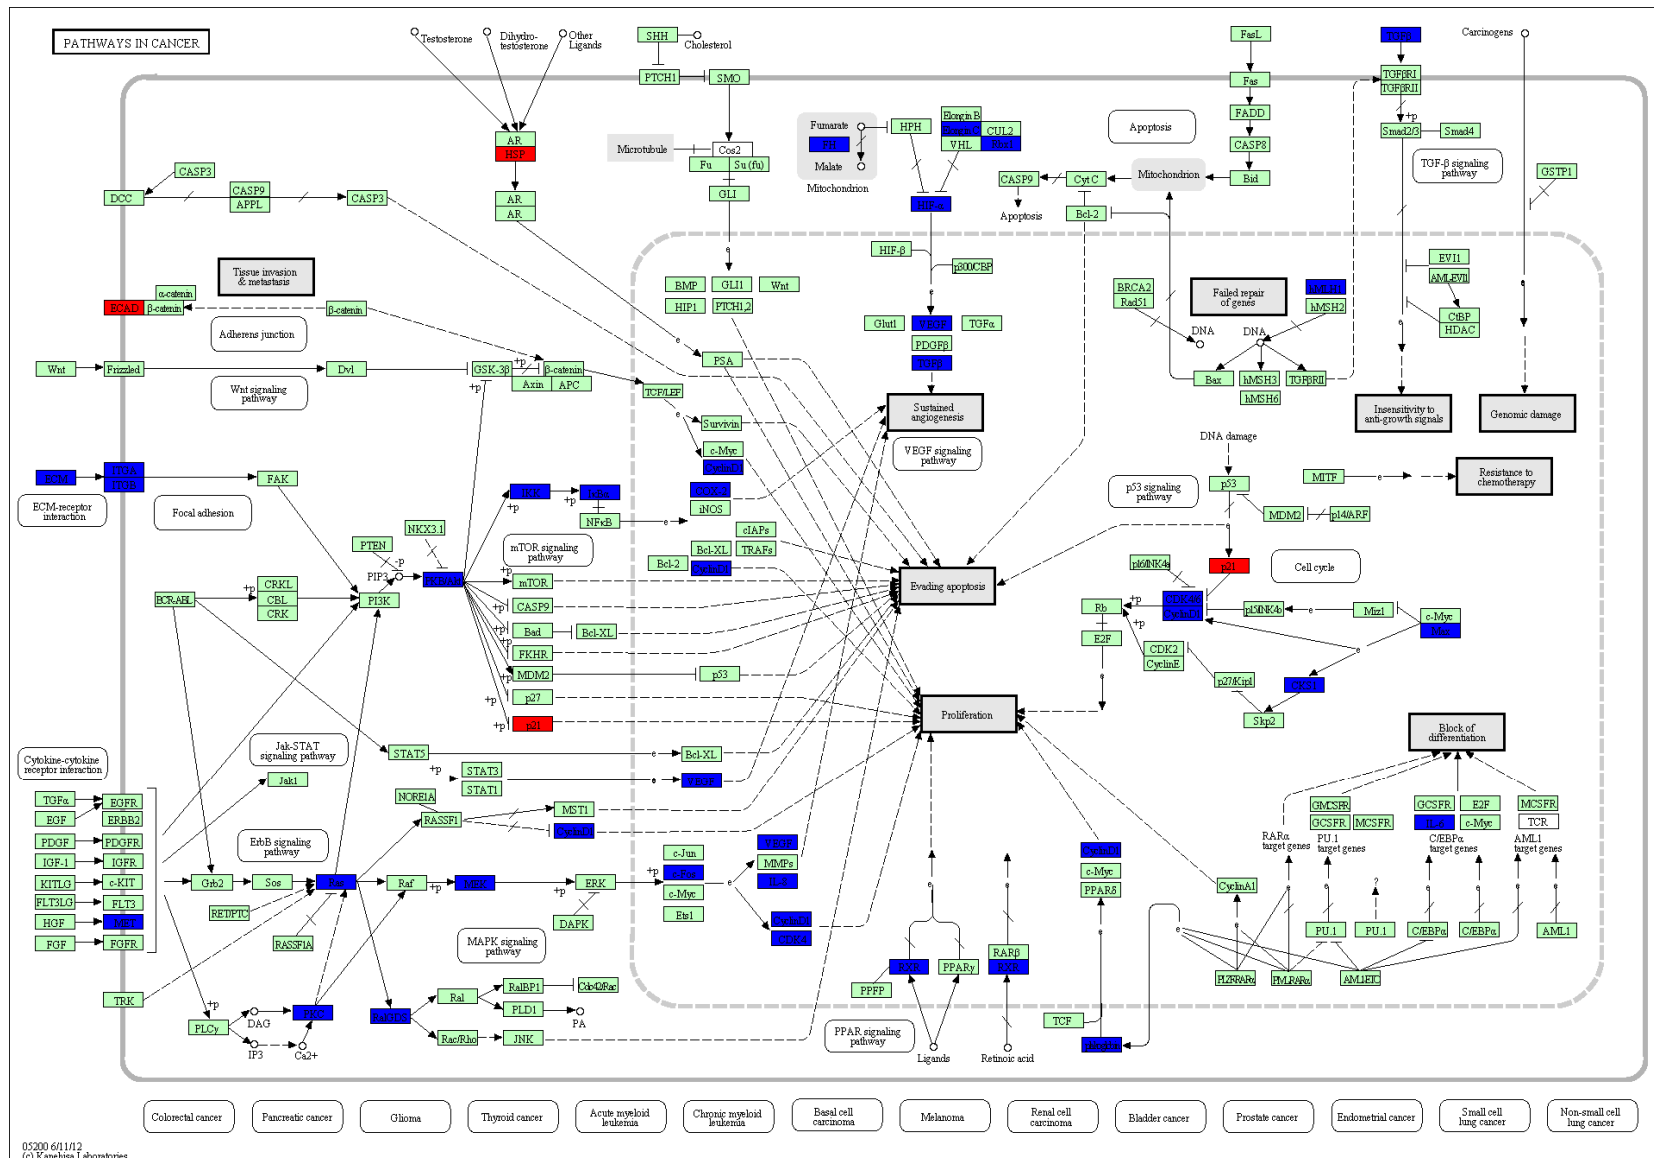

**Supplementary Figure 8. KEGG (Kyoto Encyclopedia of Genes and Genomes) analysis of cancer pathway in MDA-MB-231 cells treated with PBS or Gd@C<sub>82</sub>(OH)<sub>22</sub>.** Nodes were labeled using the gene names. Both the diminished (blue) and elevated (red) gene expression are indicated.

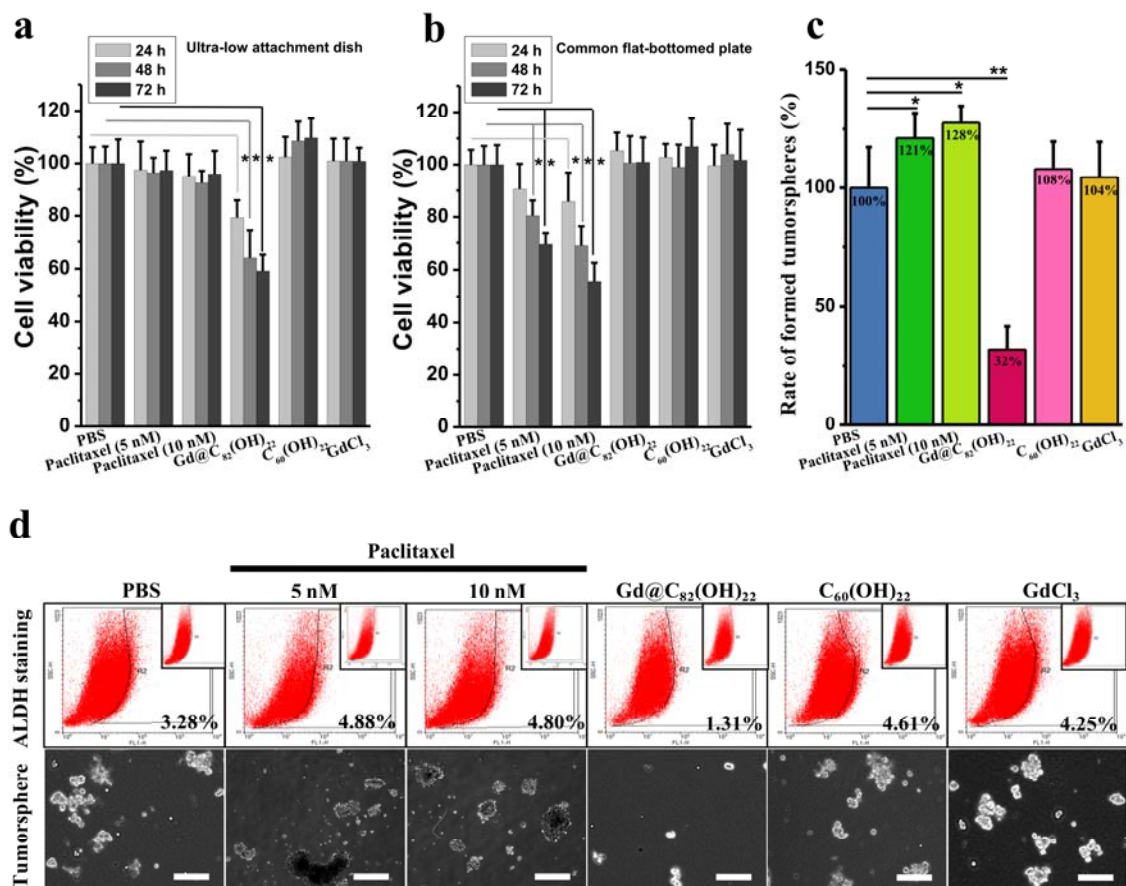

**Supplementary Figure 9.** BT549 cells were cultured in ultra-low attachment dishes (a) or adherent monolayer culture plate (b) for 10 days, and treated with PBS, Paclitaxel (5 nM or 10 nM), Gd@C<sub>82</sub>(OH)<sub>22</sub>, C<sub>60</sub>(OH)<sub>22</sub> or GdCl<sub>3</sub> (50 μM) for another 24 h, 48 h or 72 h. Cell viability was evaluated using CCK-8 assay. After treatment with PBS, Paclitaxel (5 nM or 10 nM), Gd@C<sub>82</sub>(OH)<sub>22</sub>, C<sub>60</sub>(OH)<sub>22</sub> or GdCl<sub>3</sub> (50 μM) for 21 days, BT549 were dispersed into single cells and plated in suspension cultures. Tumorspheres were evaluated using the ALDEFLUOR assay (c) and quantified (d). All the data are represented as mean ± s.e.m. (n = 3 each) with \**p* < 0.05 and \*\**p* < 0.01 (one-way ANOVA, Tukey's post-hoc test).

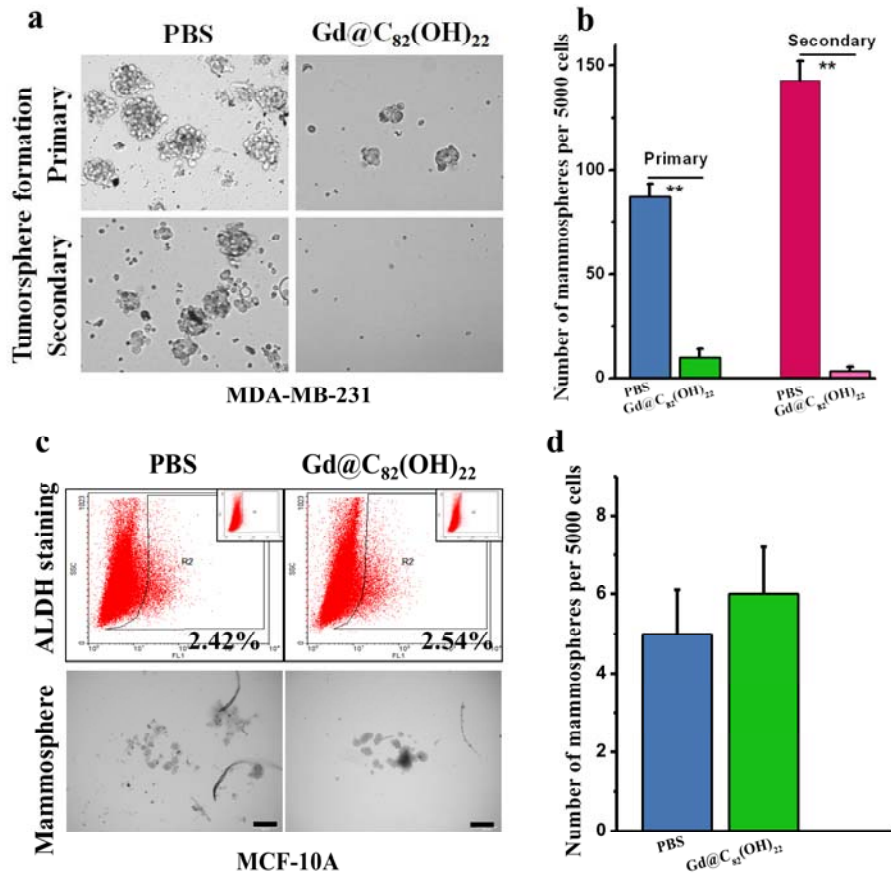

**Supplementary Figure 10.** Gd@C<sub>82</sub>(OH)<sub>22</sub> significantly inhibited the formation of primary and secondary tumorsphere formation and did not appreciably inhibit normal epithelial stem cells. MDA-MB-231 cells were maintained in PBS and Gd@C<sub>82</sub>(OH)<sub>22</sub> for 21 days and further dispersed into single cells for mammosphere formation assay. The primary mammospheres were dispersed into single cells for secondary mammosphere formation assay as a measure of self-renewal. a) Primary and secondary mammosphere. b) The tumorspheres (> 70 μm) were quantitated (mean ± s.e.m., n = 3 each). \*\**p* < 0.01 (one-way ANOVA, Tukey's post-hoc test). MCF-10A cells were maintained in PBS and Gd@C<sub>82</sub>(OH)<sub>22</sub> for 21 days and further dispersed into single cells for ALDEFLUOR assay and mammosphere formation assay (c). The mammospheres were counted (d) by microscopy (> 70 μm) (mean ± s.e.m., n = 3 each).



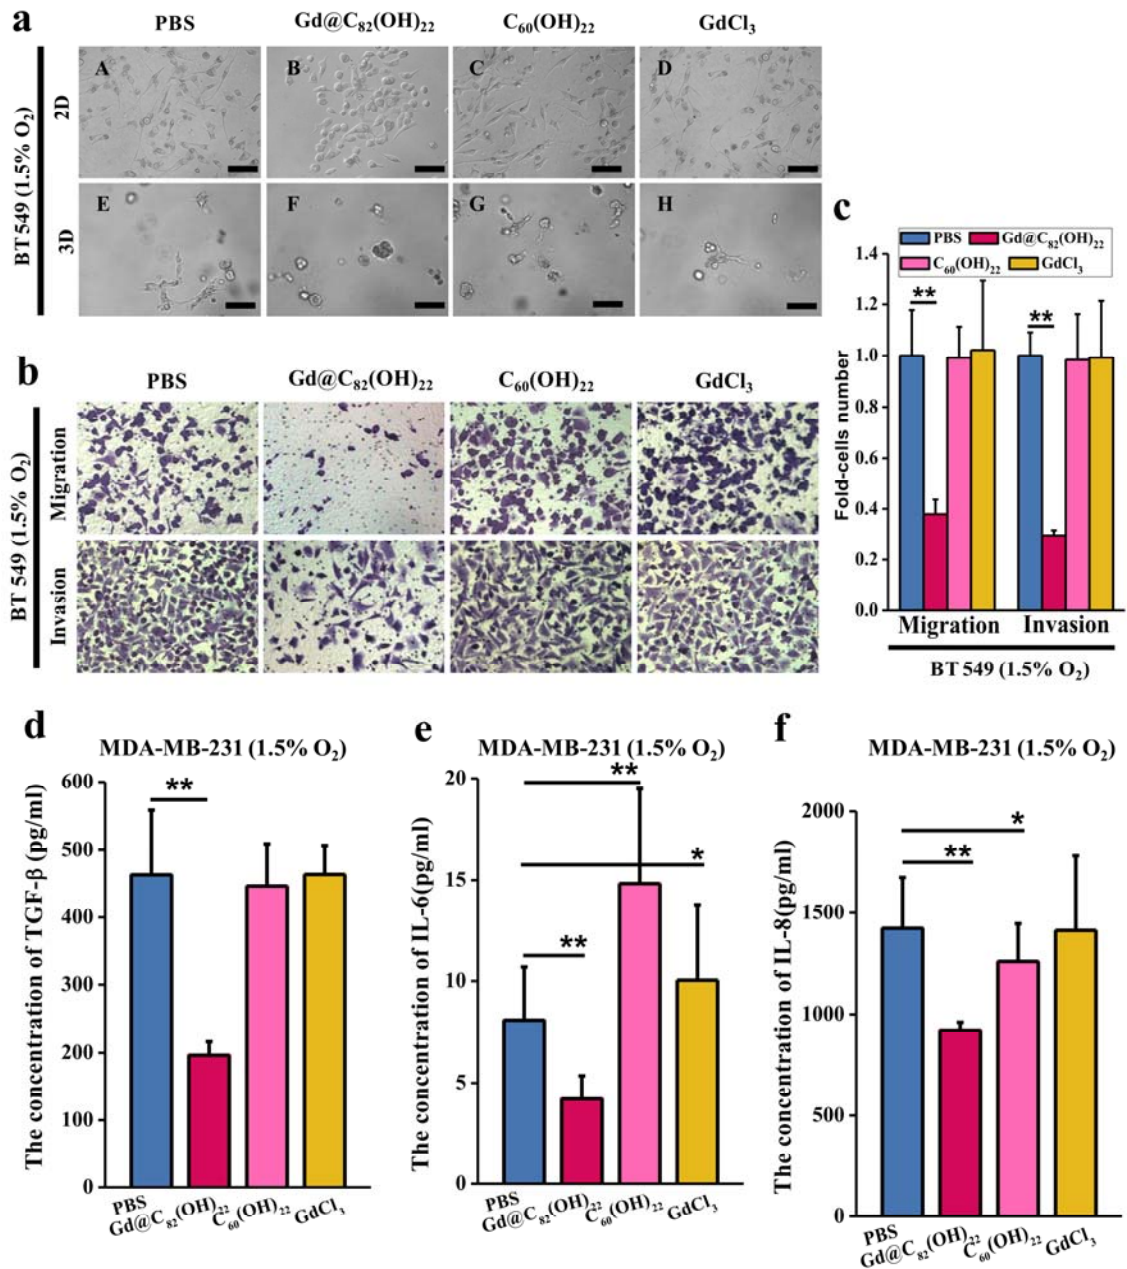

**Supplementary Figure 11.** BT549 cells were treated with PBS, Gd@C<sub>82</sub>(OH)<sub>22</sub>, C<sub>60</sub>(OH)<sub>22</sub> and GdCl<sub>3</sub> (all 50 μM) under hypoxia for 10 days. (a) Cellular morphology on 2D- and 3D-matrigel cultures. (b, c) Cell migration and invasion were examined using trans-well cell culture chambers and Matrigel-coated ones (mean ± s.e.m., n = 3 each). \*\**p* < 0.01 (one-way ANOVA, Tukey's post-hoc test). MDA-MB-231 cells were treated with PBS, Gd@C<sub>82</sub>(OH)<sub>22</sub>, C<sub>60</sub>(OH)<sub>22</sub> or GdCl<sub>3</sub> (50 μM) for 10 days under hypoxia. ELISA analysis for expression of TGF-β (d), IL-6 (e) and IL-8 (f) in supernatant culture medium were determined. All the data are represented as mean ± s.e.m. (n = 3 each) with \**p* < 0.05 and \*\**p* < 0.01 (one-way ANOVA, Tukey's post-hoc test).

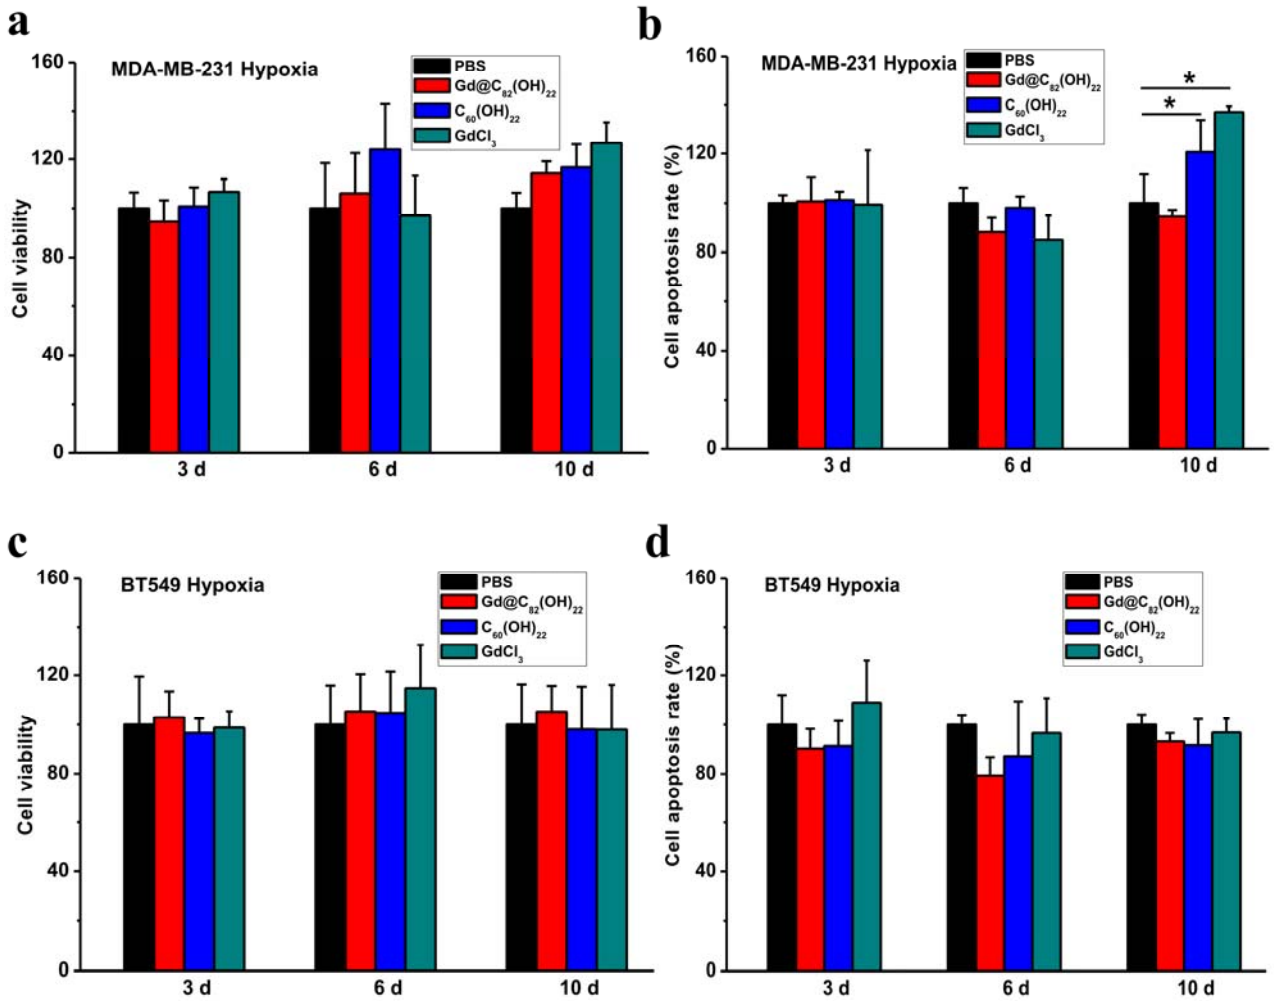

**Supplementary Figure 12.** MDA-MB-231 and BT549 cells were treated with PBS, Gd@C<sub>82</sub>(OH)<sub>22</sub>, C<sub>60</sub>(OH)<sub>22</sub> or GdCl<sub>3</sub> (all 50 μM) for 10 days under hypoxia. (a, c) Cell viability was detected using CCK-8 assay. (b, d) Cells apoptosis analysis was detected using double staining with annexin V and PI. All the data are represented as mean ± s.e.m. (n = 3 each) with \**p* < 0.05 (one-way ANOVA, Tukey's post-hoc test).

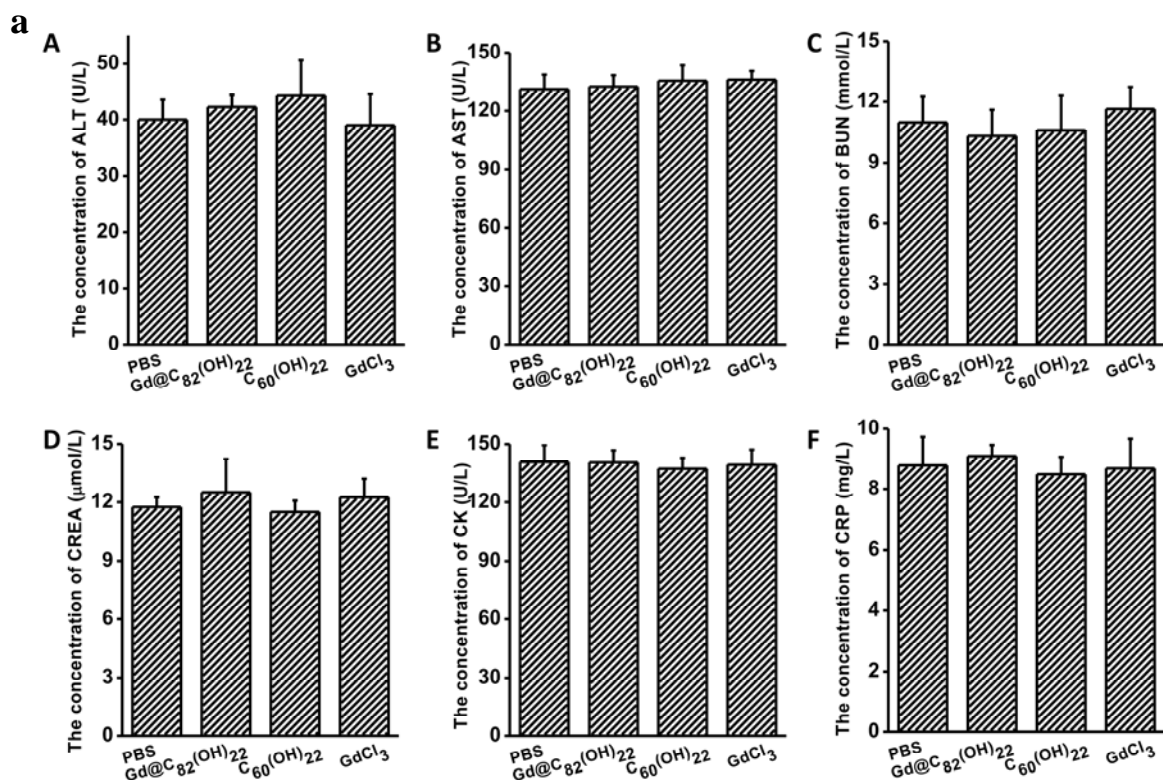

**b**

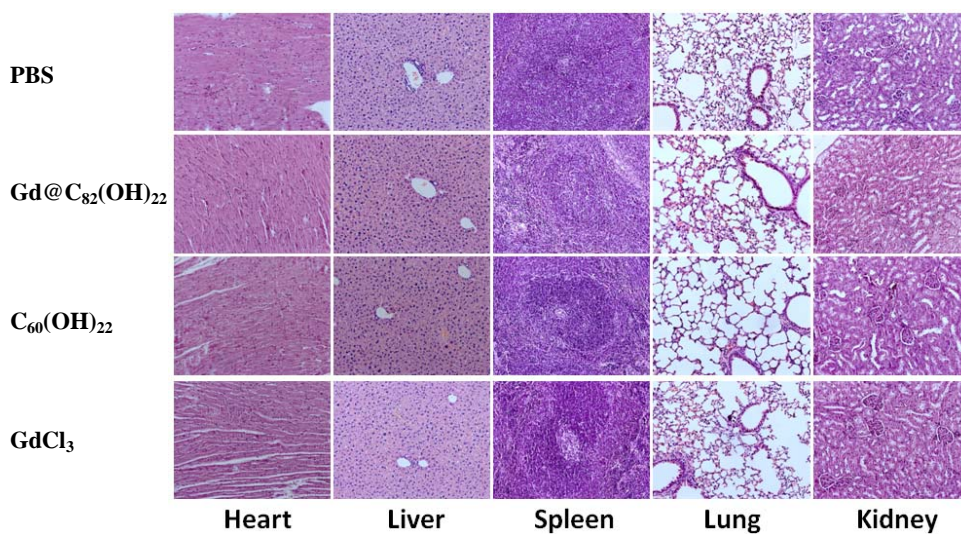

**Supplementary Figure 13. Toxicity of Gd@C<sub>82</sub>(OH)<sub>22</sub> nanoparticles *in vivo*.** Nude mice were injected with either 0.1 mL PBS, or 2.5 μmol/kg Gd@C<sub>82</sub>(OH)<sub>22</sub>, C<sub>60</sub>(OH)<sub>22</sub> or GdCl<sub>3</sub> for 21 days once a day *i.p.* before sacrifice. (a) Serum ALT (A), AST (B), BUN (C), CREA (D), CK (E) and CRP (F) levels. (b) HE staining of various tissues (liver, spleen, kidney, heart and lung).

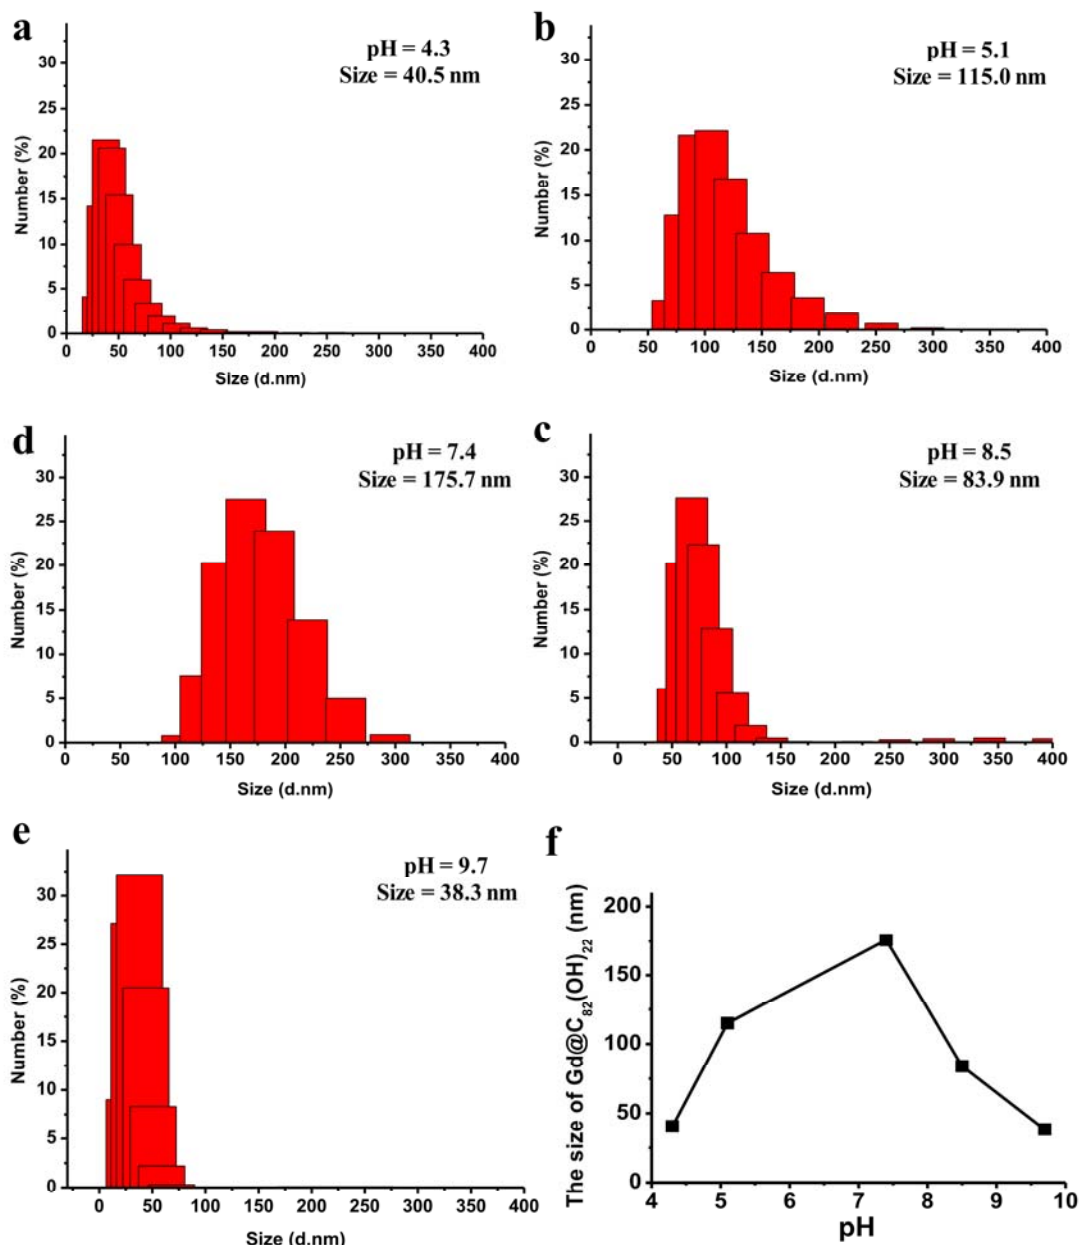

**Supplementary Figure 14. The size and zeta potential measurement of the Gd@C<sub>82</sub>(OH)<sub>22</sub> nanoparticle in different pH solutions.** (a) pH = 4.3, the average size is ~40 nm; (b) pH = 5.1, the average size is ~116 nm; (c) pH = 7.4, the average size is ~175 nm; (d) pH = 8.5, the average size is ~84 nm; (e) pH = 9.7, the average size is 38 nm; (f) The average size of the Gd@C<sub>82</sub>(OH)<sub>22</sub> nanoparticles in different pH solutions.



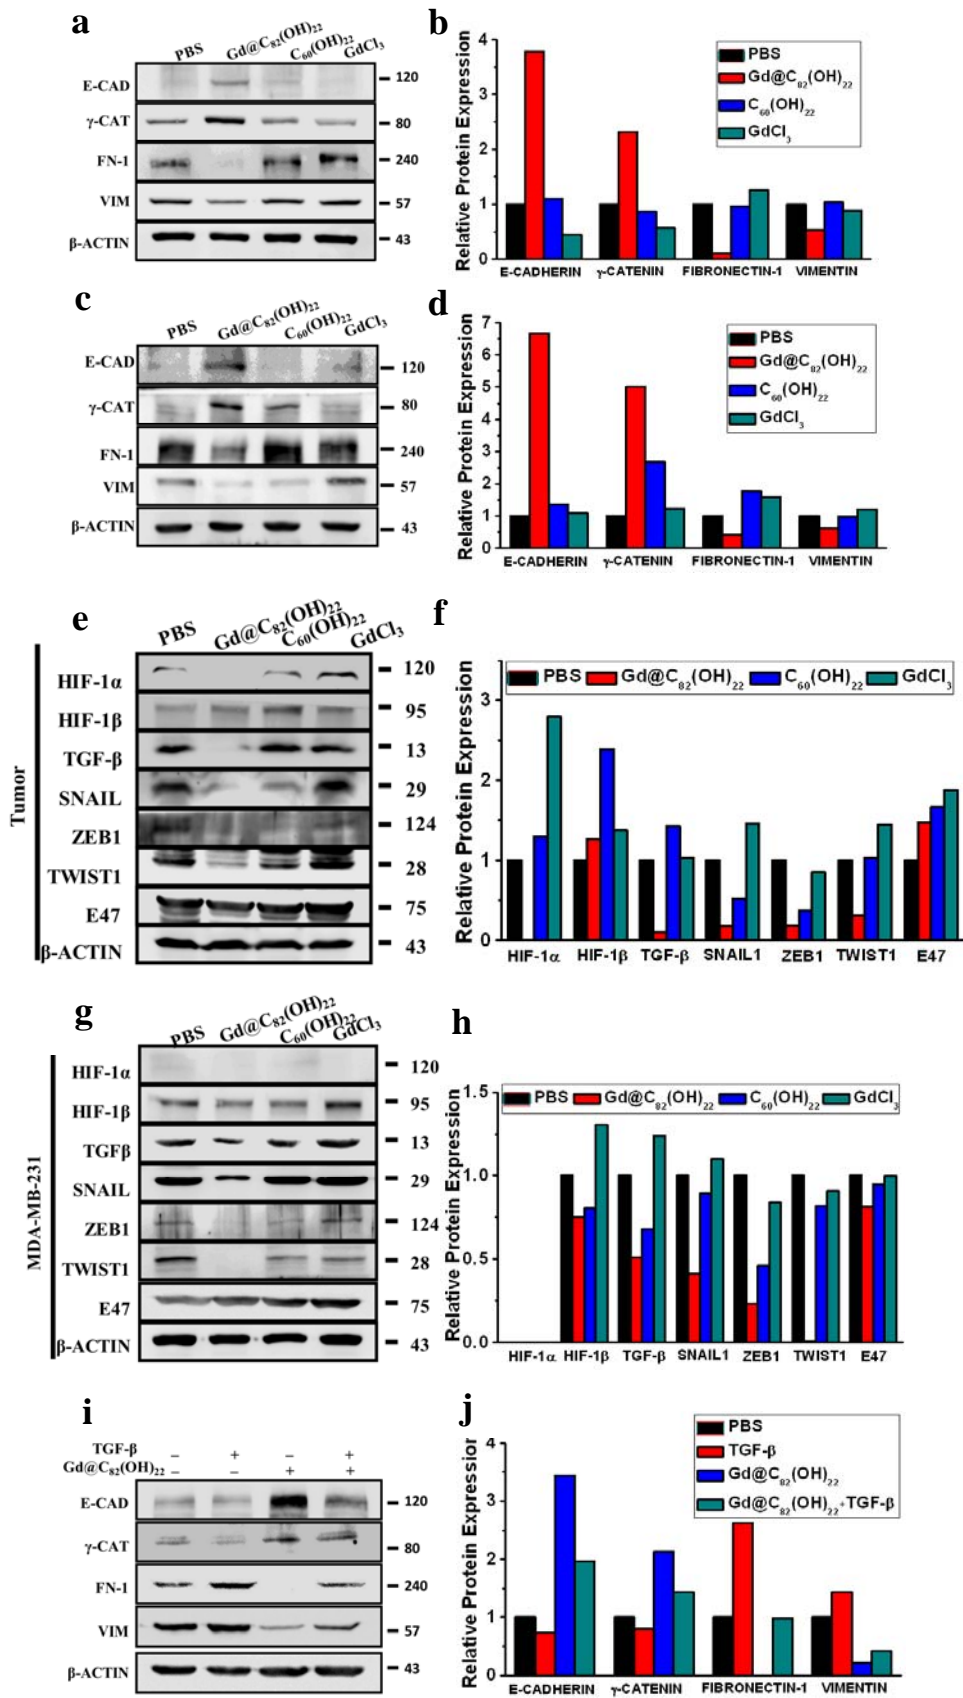

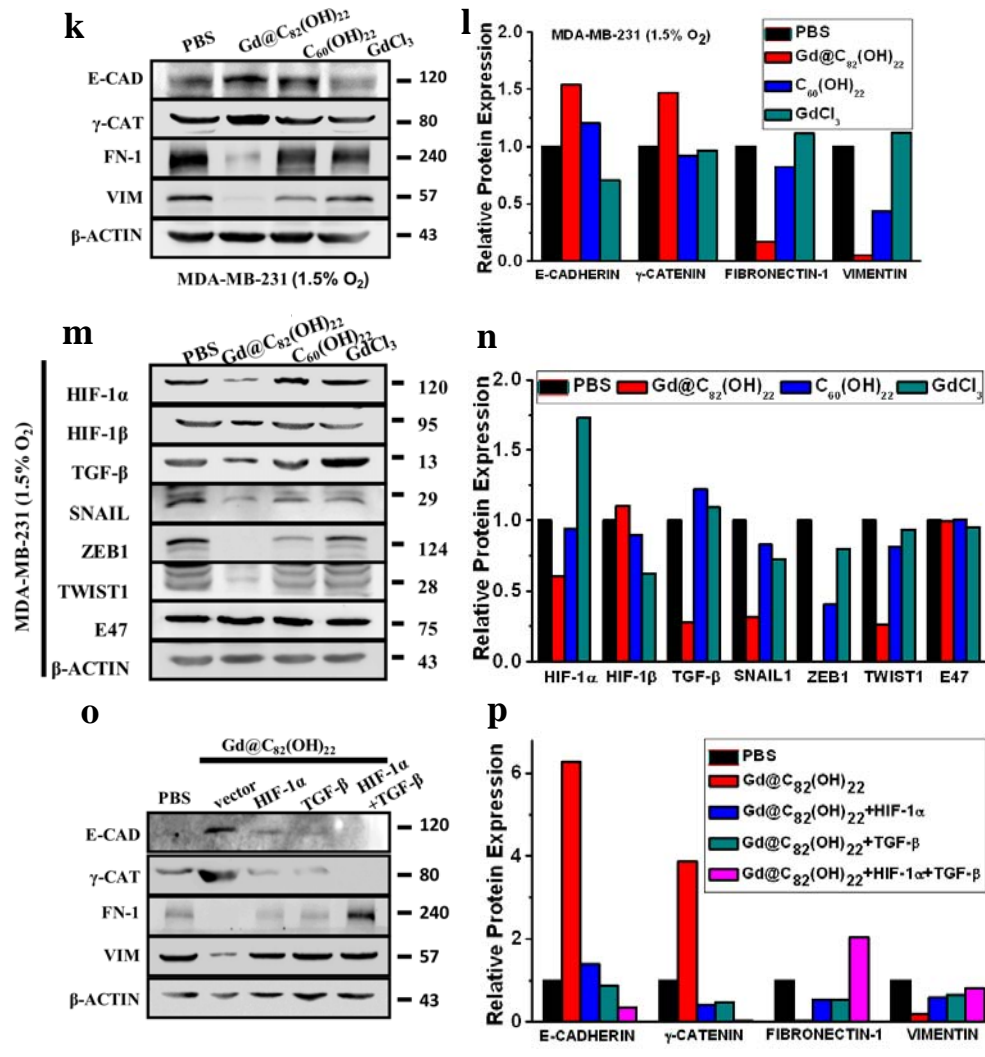

Supplementary Figure 15. All Western blot results have been quantified using Gelpro32 analysis software. (a, b) Figure 1d, (c, d) Figure 2g, (e, f) Figure 3c, (g, h) Figure 3j, (i, j) Figure 4c, (k, l) Figure 7e, (m, n) Figure 7i, (o, p) Figure 8b.

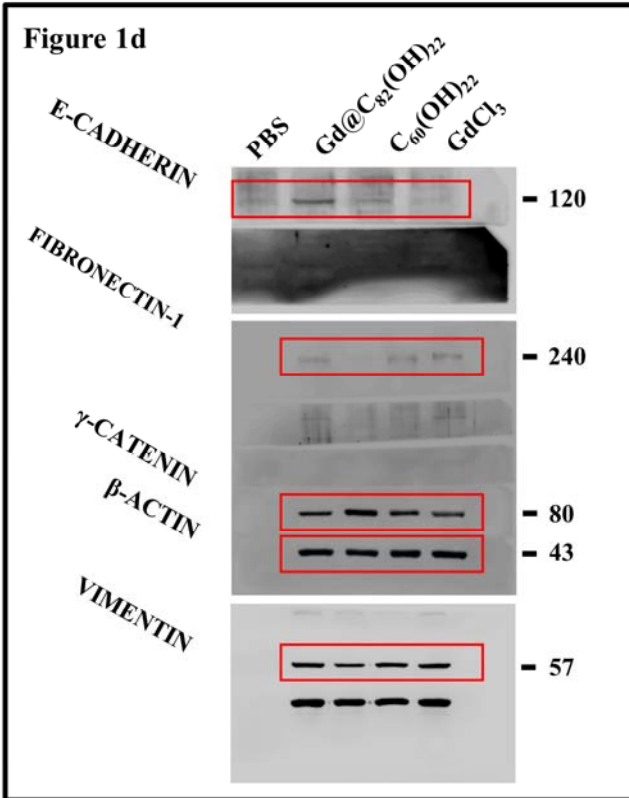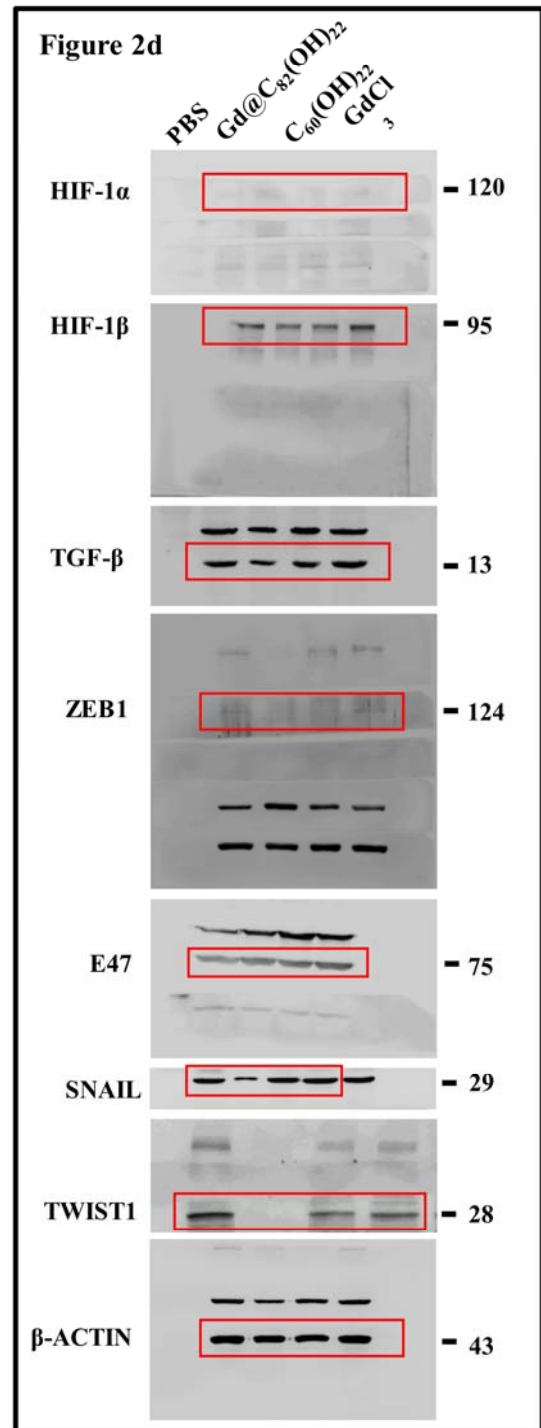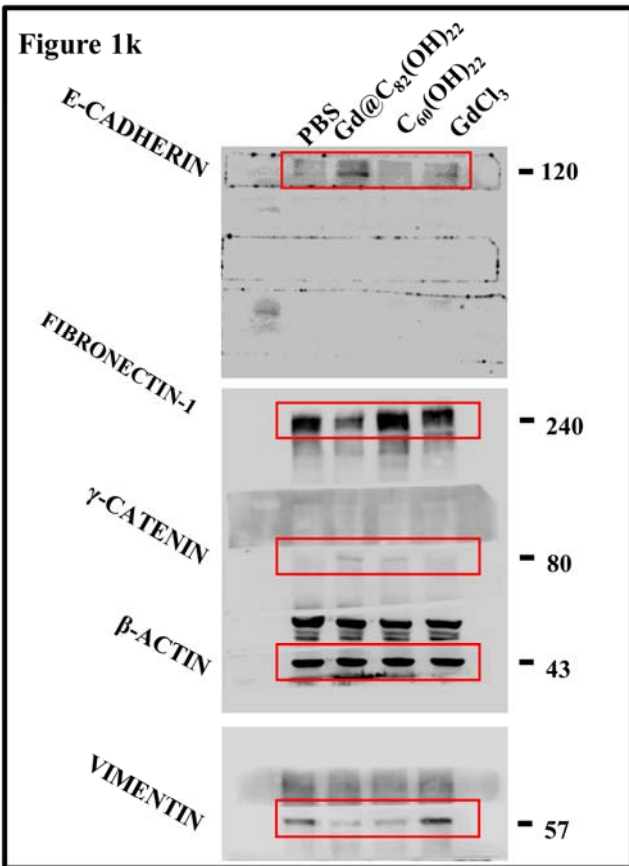

Supplementary Figure 8I

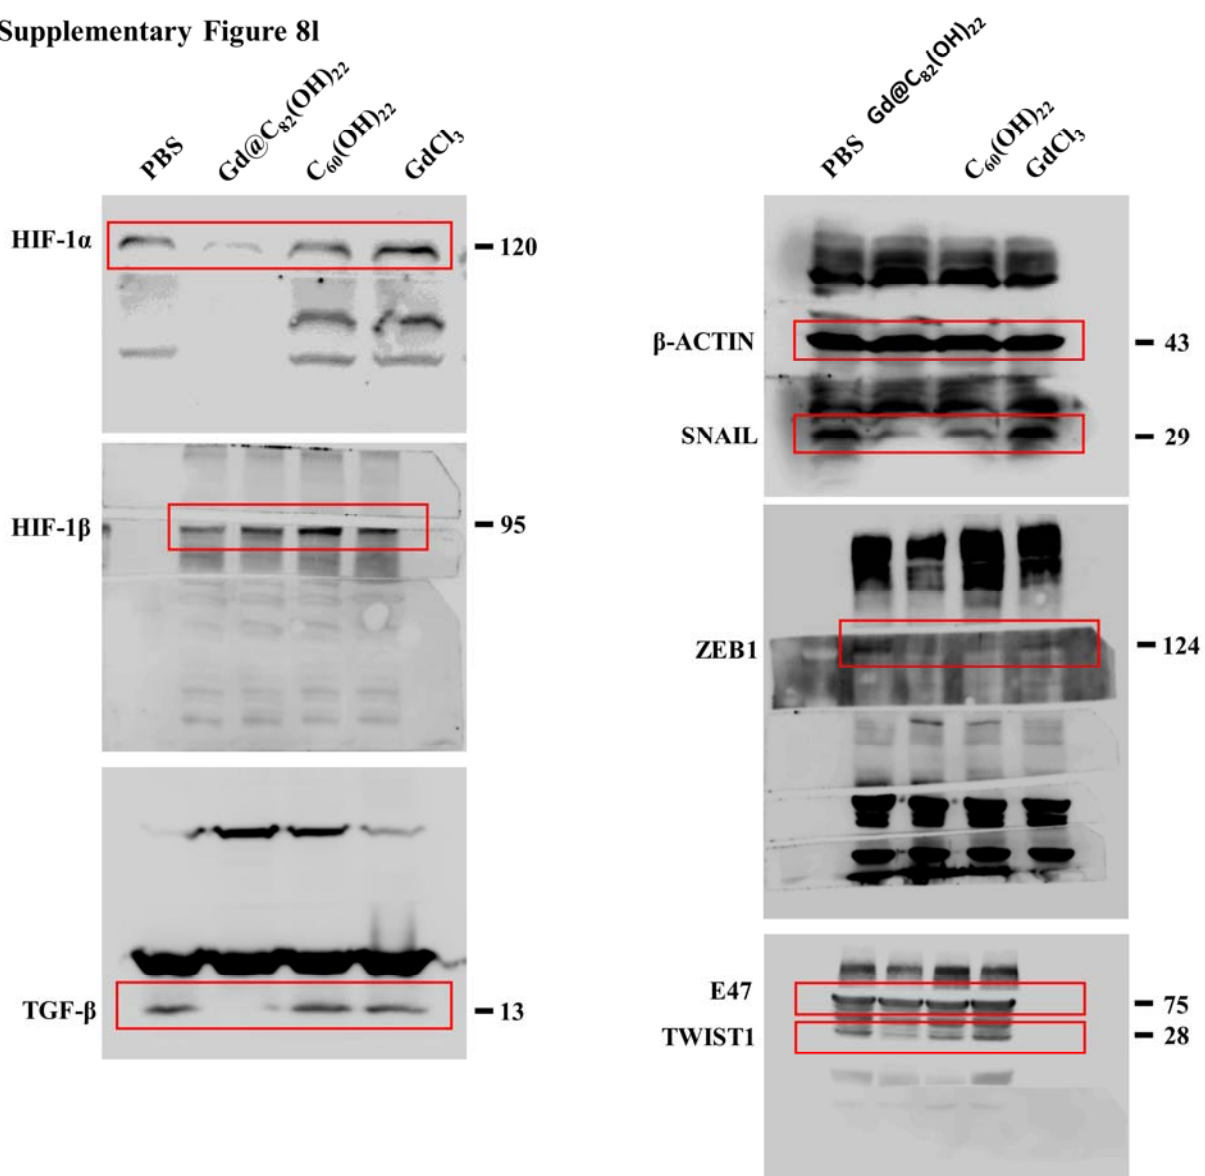



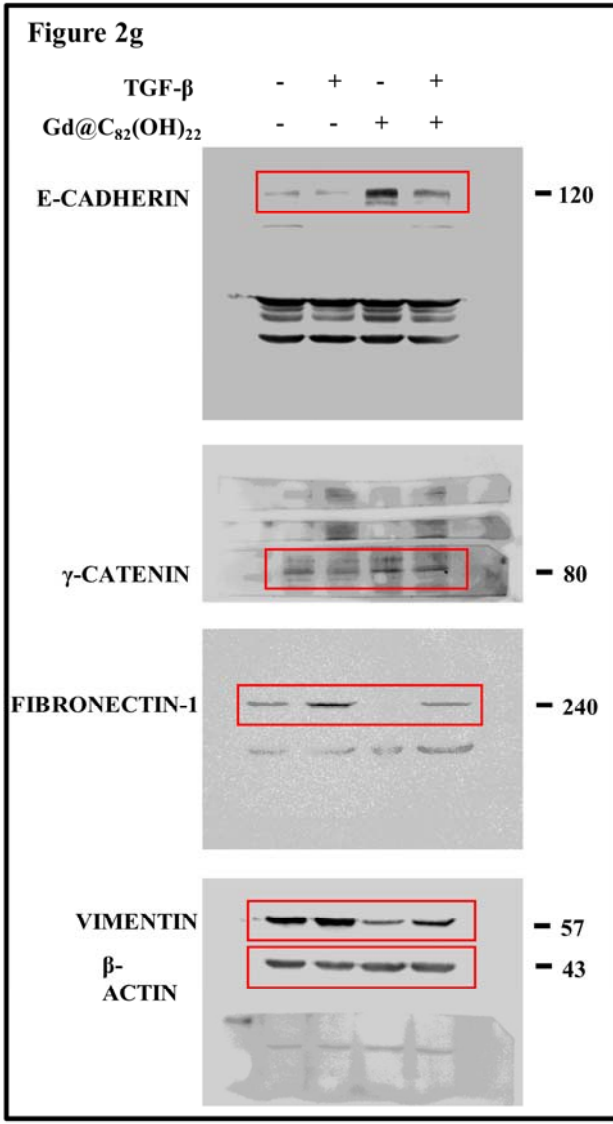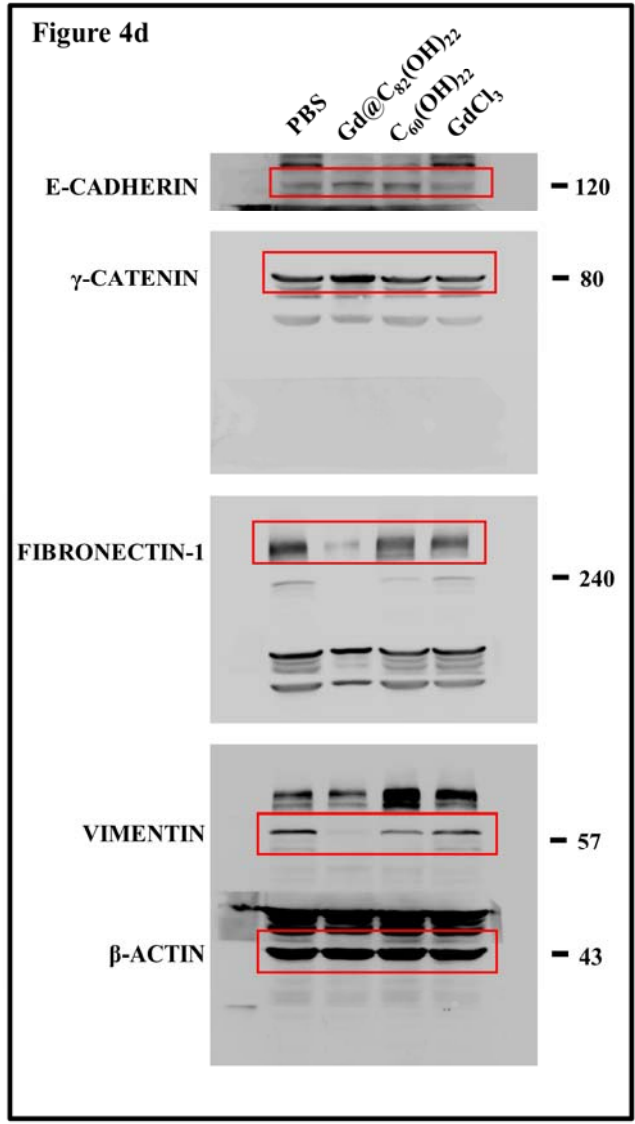

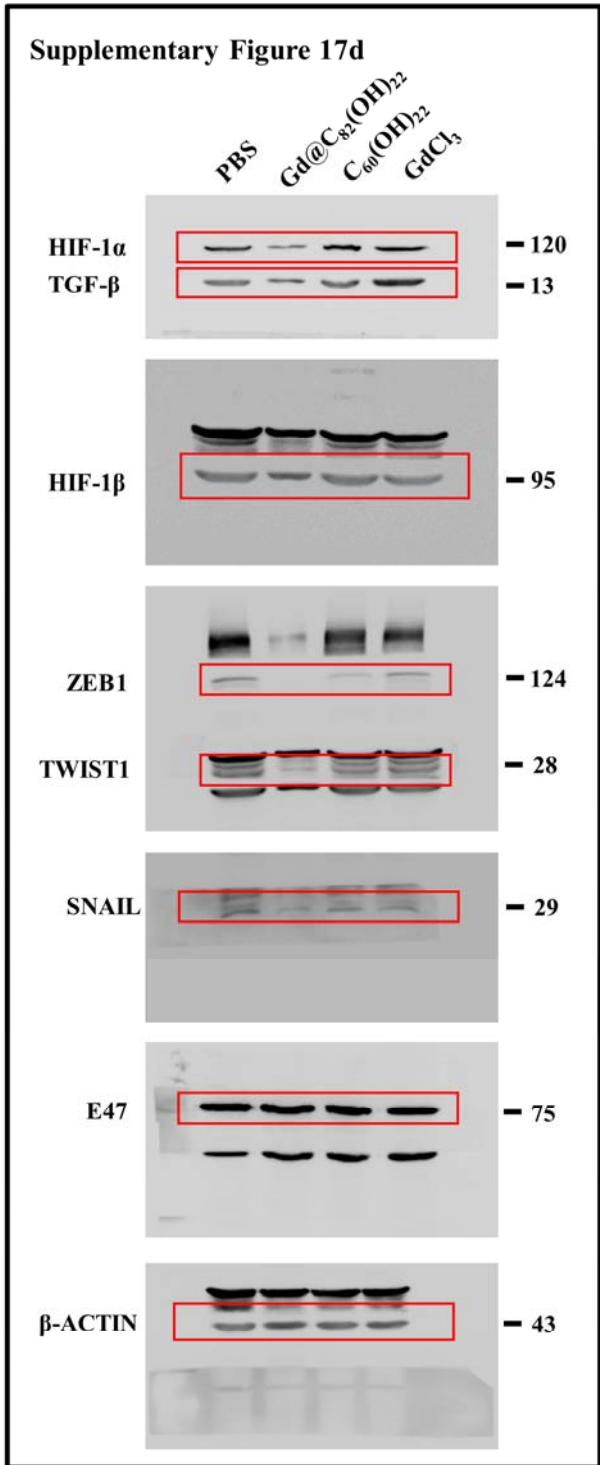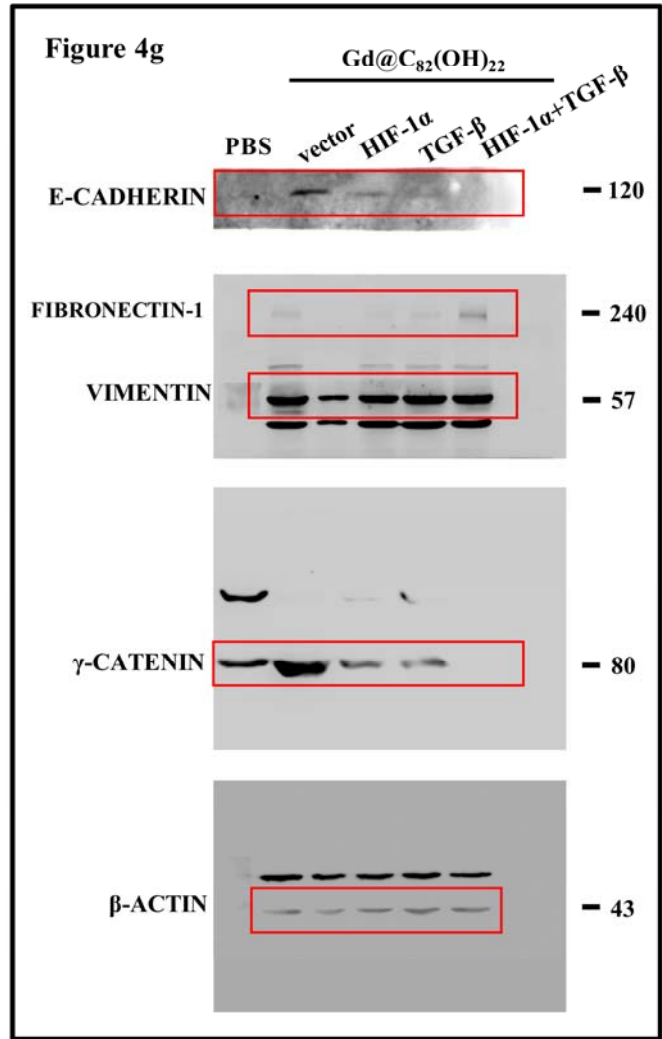

Supplementary Figure 16. Uncropped western blots with indicated areas of selection.

**Supplementary Table 1. Anti-tumor activity of Gd@C<sub>82</sub>(OH)<sub>22</sub> nanoparticles in mice model by approach I (early treatment).**

| <b>Group</b>                              | <b>Tumor Weight (g)</b> | <b>T-test</b> | <b>Inhibition rate (%)</b> |
|-------------------------------------------|-------------------------|---------------|----------------------------|
| <b>PBS</b>                                | 0.32 ± 0.25             | /             | /                          |
| <b>Gd@C<sub>82</sub>(OH)<sub>22</sub></b> | 0.18 ± 0.03             | p < 0.05      | 55.25                      |
| <b>C<sub>60</sub>(OH)<sub>22</sub></b>    | 0.19 ± 0.04             | p < 0.05      | 40.62                      |
| <b>GdCl<sub>3</sub></b>                   | 0.29 ± 0.20             | p > 0.05      | 9.38                       |

\* 1×10<sup>6</sup> MDA-MB-231 cells were injected *s.c.* and mice were treated with PBS, Gd@C<sub>82</sub>(OH)<sub>22</sub>, C<sub>60</sub>(OH)<sub>22</sub> or GdCl<sub>3</sub> daily at day 0 for 21 days. And at the day 21<sup>st</sup>, the mice were executed and analysed.

**Supplementary Table 2. Anti-tumor activity of Gd@C<sub>82</sub>(OH)<sub>22</sub> nanoparticles in mice model by approach II (terminal treatment).**

| <b>Group</b>                              | <b>Tumor Weight (g)</b> | <b>T-test</b> | <b>Inhibition rate (%)</b> |
|-------------------------------------------|-------------------------|---------------|----------------------------|
| <b>PBS</b>                                | 0.45 ± 0.12             | /             | /                          |
| <b>Gd@C<sub>82</sub>(OH)<sub>22</sub></b> | 0.22 ± 0.10             | p < 0.05      | 51.11                      |
| <b>C<sub>60</sub>(OH)<sub>22</sub></b>    | 0.48 ± 0.12             | p > 0.05      | - 6.67                     |
| <b>GdCl<sub>3</sub></b>                   | 0.45 ± 0.17             | p > 0.05      | 0                          |

\* 1×10<sup>6</sup> MDA-MB-231 cells were injected *s.c.* When the tumors grew to 100 mm<sup>3</sup>, the mice were treated with PBS, Gd@C<sub>82</sub>(OH)<sub>22</sub>, C<sub>60</sub>(OH)<sub>22</sub> or GdCl<sub>3</sub> daily for 21 days. And after 21 days, the mice were executed and analysed.

**Supplementary Table 3. Incidence of lung and liver metastases in mice with MDA-MB-231 cells injection *i.v.* (metastasis model)**

|                                            | <b>Lung metastases</b> | <b>Liver metastases</b> |
|--------------------------------------------|------------------------|-------------------------|
| <b>PBS*</b>                                | 6/6                    | 4/6                     |
| <b>Gd@C<sub>82</sub>(OH)<sub>22</sub>*</b> | 1/6                    | 0/6                     |
| <b>C<sub>60</sub>(OH)<sub>22</sub>*</b>    | 5/6                    | 3/6                     |
| <b>GdCl<sub>3</sub>*</b>                   | 6/6                    | 6/6                     |

\*  $1 \times 10^6$  MDA-MB-231 cells were injected *i.v.* and mice were treated with PBS, Gd@C<sub>82</sub>(OH)<sub>22</sub>, C<sub>60</sub>(OH)<sub>22</sub> or GdCl<sub>3</sub> daily at day 0 for 21 days. And at the day 21<sup>st</sup>, the mice were executed and analysed.

\* The numbers represent “the number of mice with lung or liver metastases/the number of mice in every group”.



**Supplementary Table 4. Summary of tumor formation in mice models**

| <b>Groups</b>                             | <b>A</b>                 | <b>B</b>          | <b>C</b>          | <b>D</b>          | <b>E</b>          | <b>F</b>          | <b>G</b>           | <b>H</b>          | <b>I</b>          |
|-------------------------------------------|--------------------------|-------------------|-------------------|-------------------|-------------------|-------------------|--------------------|-------------------|-------------------|
| <b>Injected cell number</b>               | $5 \times 10^6$          | $5 \times 10^5$   | $5 \times 10^4$   | $5 \times 10^3$   | $5 \times 10^2$   | $1 \times 10^6$   | $1 \times 10^6$    | $1 \times 10^6$   | $1 \times 10^6$   |
| <b>Mice model</b>                         | <b>Cancer stem cells</b> |                   |                   |                   |                   | <b>Approach I</b> | <b>Approach II</b> | <b>Withdrawal</b> | <b>Metastasis</b> |
| <b>Delivery approach</b>                  | <b>Peritoneal</b>        | <b>Peritoneal</b> | <b>Peritoneal</b> | <b>Peritoneal</b> | <b>Peritoneal</b> | <b>Peritoneal</b> | <b>Peritoneal</b>  | <b>Peritoneal</b> | <b>Tail vein</b>  |
| <b>PBS</b>                                | 6                        | 6                 | 6                 | 6                 | 6                 | 5                 | 5                  | 5                 | 5                 |
| <b>Gd@C<sub>82</sub>(OH)<sub>22</sub></b> | 6                        | 6                 | 6                 | 6                 | 6                 | 5                 | 5                  | 5                 | 5                 |
| <b>C<sub>60</sub>(OH)<sub>22</sub></b>    | 6                        | 6                 | 6                 | 6                 | 6                 | 5                 | 5                  | 5                 | 5                 |
| <b>Injection GdCl<sub>3</sub></b>         | 6                        | 6                 | 6                 | 6                 | 6                 | 5                 | 5                  | 5                 | 5                 |

**Supplementary Table 5. Sequence of the oligonucleotides for real-time PCR experiments**

| Gene                        | Sense Strand (5'-3')      | Antisense Strand (5'-3')  | Amplicon (bp) |
|-----------------------------|---------------------------|---------------------------|---------------|
| <i>bmi1</i>                 | AAATGCTGGAGAACTGGAAAG     | CTGTGGATGAGGAGACTGC       | 124           |
| <i>csfl</i>                 | GCAGCGGCTGATTGACAGT       | CAGCTGCACAATGGCGAT        | 185           |
| <i>klf4</i>                 | ACATGGCTGTCAGCGACGCG      | GCCAGCGGTTATTCGGGGCAC     | 108           |
| <i>lin28a</i>               | TTCGGCTTCCTGTCCATGAC      | TGACTCAAGGCCTTTGGAAG      | 123           |
| <i>nanog</i>                | CAACCAGACCCAGAACATCC      | TTCCAAAGCAGCCTCCAAG       | 185           |
| <i>cd44</i>                 | CAGGGACAGCTGCAGCCTCA      | ACCTCGTCCCATGGGGTGTG      | 122           |
| <i>cd24</i>                 | CCAACCTAATGCCACCACCA      | GACGTTTCTTGGCCTGAGTC      | 118           |
| <i>aldh1</i>                | TCGTCTGCTGCTGGCGACAATG    | CCCAACCTGCACAGTAGCGCAA    | 113           |
| <i>ptgs2 (cox2)</i>         | TGAAACCCACTCCAAACACA      | GAGAAGGCTTCCCAGCTTTT      | 185           |
| <i>tgf-β</i>                | GGAAATTGAGGGCTTTCGCC      | CCGGTAGTGAACCCGTTGAT      | 90            |
| <i>hif1α</i>                | TTTTTCAAGCAGTAGGAATTGGA   | GTGATGTAGTAGCTGCATGATCG   | 66            |
| <i>snail</i>                | TGCGCTACTGCTGCGCGAAT      | GGGCTGCTGGAAGGTAAACTCTGGA | 147           |
| <i>zeb1</i>                 | AAGAATTCACAGTGGAGAGAAGCCA | CGTTTCTTGCAGTTTGGGCATT    | 50            |
| <i>e47</i>                  | GCATTGAGGCCTTGTGGA        | GGTAACGGTGGAGTCTCAGG      | 96            |
| <i>twist1</i>               | GGAGTCCGCAGTCTTACGAG      | TCTGGAGGACCTGGTAGAGG      | 200           |
| <i>cdh1 (e-cadherin)</i>    | TGCCAGAAAATGAAAAAGG       | GTGTATGTGGCAATGCGTTC      | 199           |
| <i>jup (γ-catenin)</i>      | CCCCGCCTGGTGCAGAACTG      | GGAGAGTGTGCCCGTGGCAC      | 153           |
| <i>vim (vimentin)</i>       | CGAGGAGAGCAGGATTTCTC      | GGTATCAACCAGAGGGAGTGA     | 90            |
| <i>fn-1 (fibronectin-1)</i> | AGGCAGGCTCAGCAAATG        | TTAGGACGCTCATAAGTGTACCC   | 260           |

|                                             |                        |                        |     |
|---------------------------------------------|------------------------|------------------------|-----|
| <i>cdh2 (n-cadherin)</i>                    | ACAGTGGCCACCTACAAAGG   | CCGAGATGGGGTTGATAATG   | 200 |
| <i>ocln (occludin)</i>                      | TGCCGCGTTGGTGATCTTT    | GCCCAGGATAGCACTCACTATT | 100 |
| <i>ctnna1 (<math>\alpha</math>-catenin)</i> | CCATGCAGGCAACATAAACTTC | GGCTCCAACAGTCTCTCAACT  | 81  |
| <i>ctnnb1 (<math>\beta</math>-catenin)</i>  | CCCCTGGCCTCTGATAAAGG   | ACGCAAAGGTGCATGATTTG   | 80  |
| <i>il-6</i>                                 | GGATTCAATGAGGAGACTTGCC | TGGCATTGTGGTTGGGTCA    | 208 |
| <i>il-8</i>                                 | TAAAGACATACTCCAAACC    | ACTTCTCCACAACCCTC      | 165 |
| <i>vegf</i>                                 | CGCAAGAAATCCCGGTATAA   | TCTCCGCTCTGAGCAAGG     | 111 |
| <i>mmp-2</i>                                | ACAGAACCCTTGGAGCCAAT   | GAAAGGTTCTAAGGCAGCCA   | 142 |
| <i>mmp-9</i>                                | CGTCTTCCAGTACCGAGAGA   | GCAGGATGTCATAGGTCACG   | 119 |
| <i>gapdh</i>                                | TCCCATCACCATCTTCCAGG   | CCATCACGCCACAGTTTCC    | 98  |

**Supplementary Table 6. List of proteins tested by antibodies and characteristics of the corresponding antibodies used**

| <b>Protein</b>     | <b>Assay</b> | <b>Antibody</b> | <b>Origin</b>         | <b>Dilution</b> | <b>Incubation period</b> |
|--------------------|--------------|-----------------|-----------------------|-----------------|--------------------------|
| E-CADHERIN         | WB           | mmab            | # 610181, BD          | 1:5000          | overnight                |
| E-CADHERIN         | IHC          | mmab            | # 610181, BD          | 1:50            | overnight                |
| E-CADHERIN         | IF           | mmab            | # 610181, BD          | 1:100           | overnight                |
| $\gamma$ -CATENIN  | WB           | mmab            | #sc-8415, Santa Cruz  | 1:1000          | overnight                |
| $\gamma$ - CATENIN | IHC          | mmab            | #sc-8415, Santa Cruz  | 1:50            | overnight                |
| $\gamma$ - CATENIN | IF           | mmab            | #sc-8415, Santa Cruz  | 1:50            | overnight                |
| FIBRONECTIN-1      | WB           | mmab            | # 610077, BD          | 1:5000          | overnight                |
| FIBRONECTIN-1      | IHC          | mmab            | # 610077, BD          | 1:200           | overnight                |
| FIBRONECTIN-1      | IF           | mmab            | # 610077, BD          | 1:200           | overnight                |
| VIMENTIN           | WB           | mmab            | # 550513, BD          | 1:5000          | overnight                |
| VIMENTIN           | IHC          | mmab            | # 550513, BD          | 1:100           | overnight                |
| VIMENTIN           | IF           | mmab            | # 550513, BD          | 1:200           | overnight                |
| TWIST1             | WB           | rpab            | #sc-15393, Santa Cruz | 1:1000          | overnight                |
| TWIST1             | IHC          | rpab            | #sc-15393, Santa Cruz | 1:50            | overnight                |
| SNAIL              | WB           | rpab            | #sc-28199, Santa Cruz | 1:1000          | overnight                |
| SNAIL              | IHC          | rpab            | #sc-28199, Santa Cruz | 1:100           | overnight                |
| ZEB1               | WB           | rpab            | #sc-25388, Santa Cruz | 1:1000          | overnight                |
| ZEB1               | IHC          | rpab            | #sc-25388, Santa Cruz | 1:50            | overnight                |
| E47                | WB           | mmab            | # 554199, BD          | 1:5000          | overnight                |

|                |     |      |                       |        |           |
|----------------|-----|------|-----------------------|--------|-----------|
| E47            | IHC | mmab | # 554199, BD          | 1:50   | overnight |
| COX2           | WB  | gpab | #sc-23984, Santa Cruz | 1:1000 | overnight |
| COX2           | IHC | gpab | #sc-23984, Santa Cruz | 1:50   | overnight |
| TGF- $\beta$   | WB  | rpab | #sc-146, Santa Cruz   | 1:1000 | overnight |
| TGF- $\beta$   | IHC | rpab | #sc-146, Santa Cruz   | 1:50   | overnight |
| HIF1 $\alpha$  | WB  | mmab | # 610958, BD          | 1:5000 | overnight |
| HIF1 $\alpha$  | IHC | mmab | # 610958, BD          | 1:50   | overnight |
| HIF1 $\beta$   | WB  | mmab | # 611078, BD          | 1:5000 | overnight |
| HIF1 $\beta$   | IHC | mmab | # 611078, BD          | 1:200  | overnight |
| $\beta$ -ACTIN | WB  | mmab | #M20010, Abmart       | 1:5000 | 1.5 hour  |

Abbreviations: WB, Western blot; IHC, immunohistochemistry; IF, immunofluorescence; mmab, mouse monoclonal antibody; rpab, rabbit polyclonal antibody; gpab, goat polyclonal antibody.
